# Supplementary material for: Pan-cancer analysis of transcripts encoding novel open-reading frames (nORFs) and their potential biological functions
Source: PubMed Central journal article supplement (PMC7835362; doi:10.1038/s41525-020-00167-4), 2021-01-25
Supplement: 41525_2020_167_MOESM1_ESM.pdf [file 41525_2020_167_MOESM1_ESM.pdf]

# Supplementary Figures

## **Pan-cancer analysis of transcripts encoding novel open reading frames (nORFs) and their potential biological functions**

**Authors:** Chaitanya Erady<sup>1†</sup>, Adam Boxall<sup>1†</sup>, Shraddha Puntambekar<sup>2†</sup>, N. Suhas Jagannathan<sup>3†</sup>, Ruchi Chauhan<sup>1†</sup>, David Chong<sup>1</sup>, Narendra Meena<sup>1</sup>, Apurv Kulkarni<sup>2</sup>, Bhagyashri Kasabe<sup>2</sup>, Kethaki Prathivadi Bhayankaram<sup>1</sup>, Yagnesh Umrانيا<sup>4</sup>, Adam Andreani<sup>1</sup>, Jean Nel<sup>1</sup>, Matthew T. Wayland<sup>5</sup>, Cristina Pina<sup>6</sup>, Kathryn S. Lilley<sup>4</sup>, & Sudhakaran Prabakaran<sup>1\*</sup>

# Supplementary Figure 1

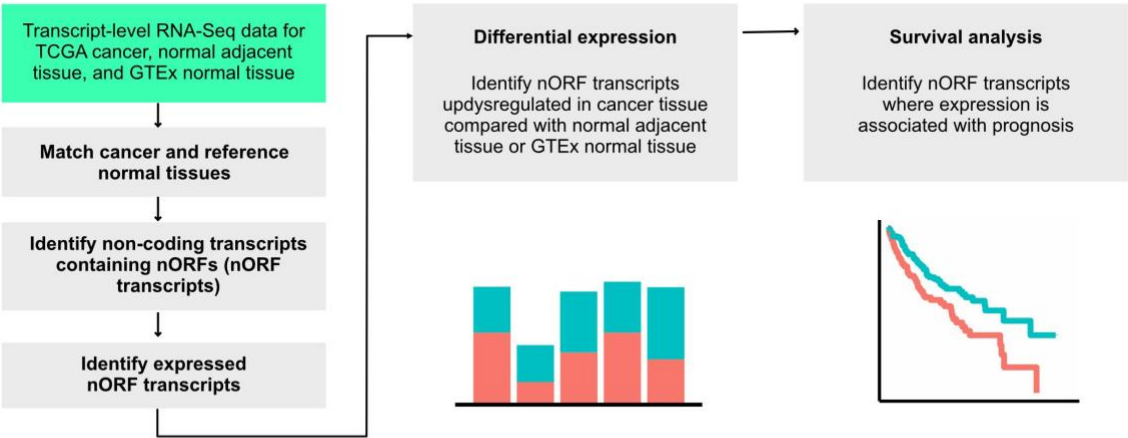

**Supplementary Figure 1. Scope of the analysis.** We obtain RNA-Seq transcript-level expected counts for samples in TCGA and GTEx, match normal and cancer tissues, identify expressed nORF transcripts and perform differential expression and survival analysis.

## Supplementary Figure 2a

CosmicNonCodingTosORFs

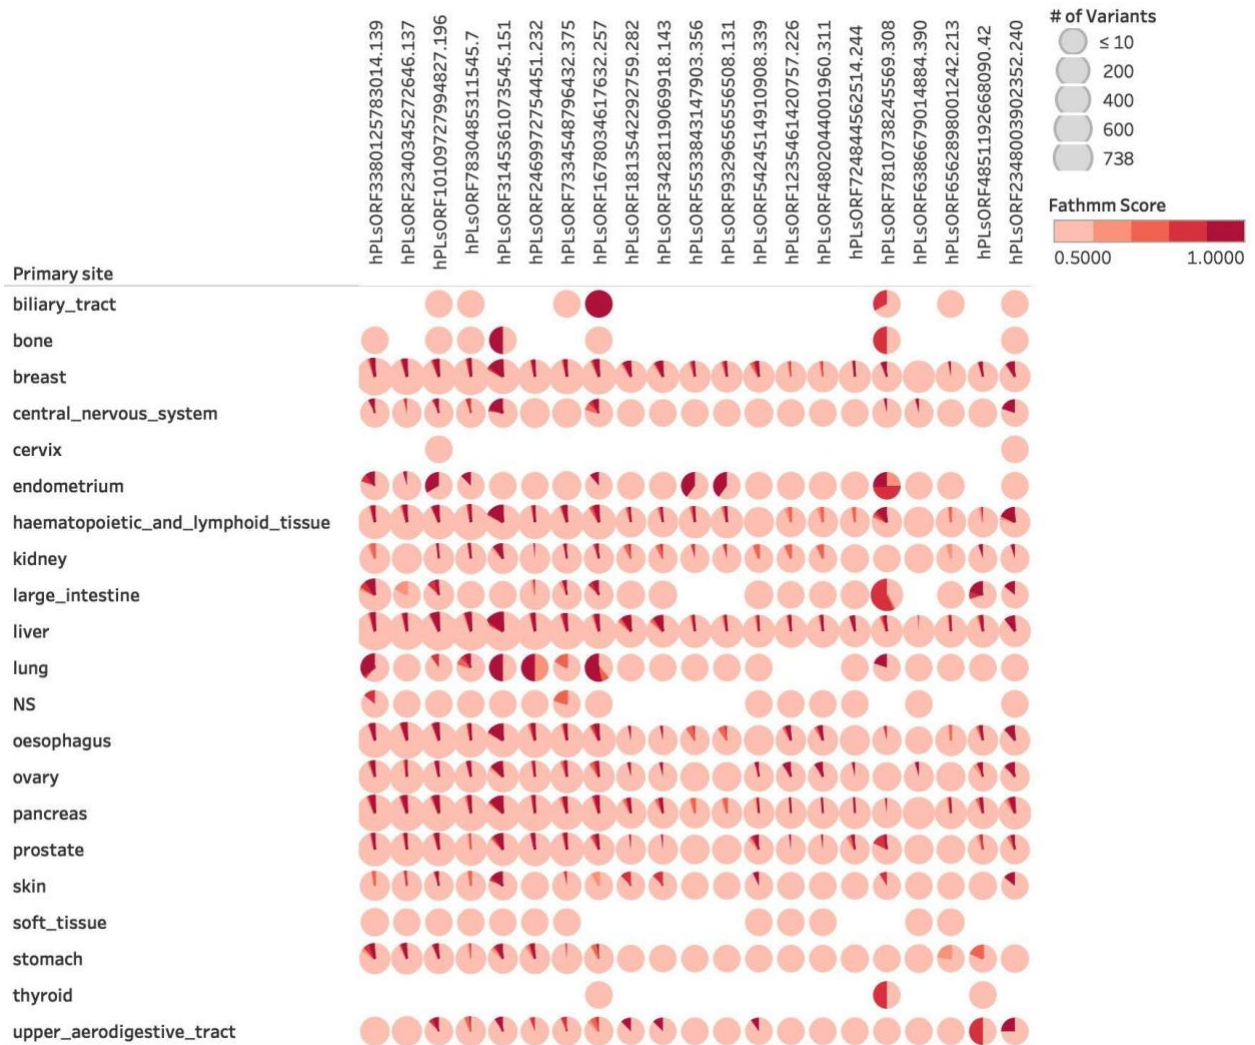

## Supplementary Figure 2b

HGMDT<sub>o</sub>sORFs

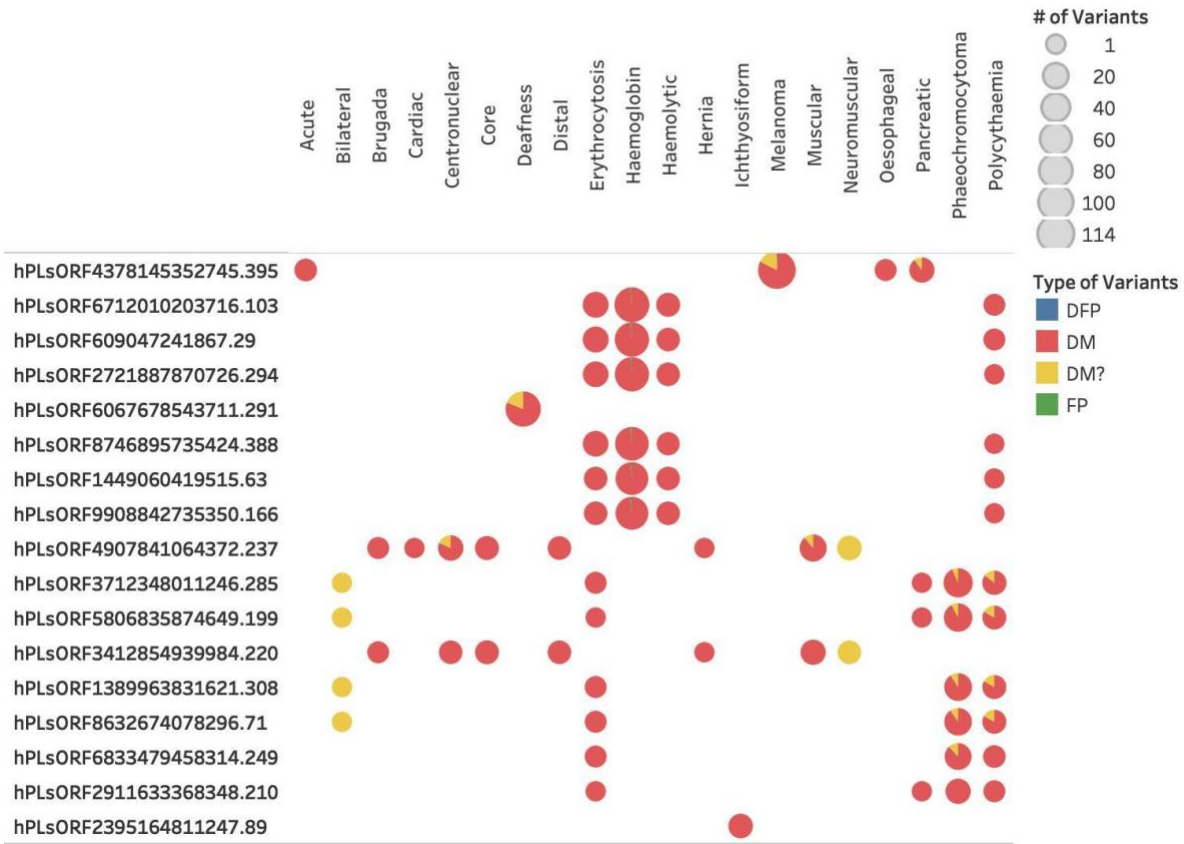

## Supplementary Figure 2c

Cosmic\_Coding\_Mutations\_Disease\_denovo

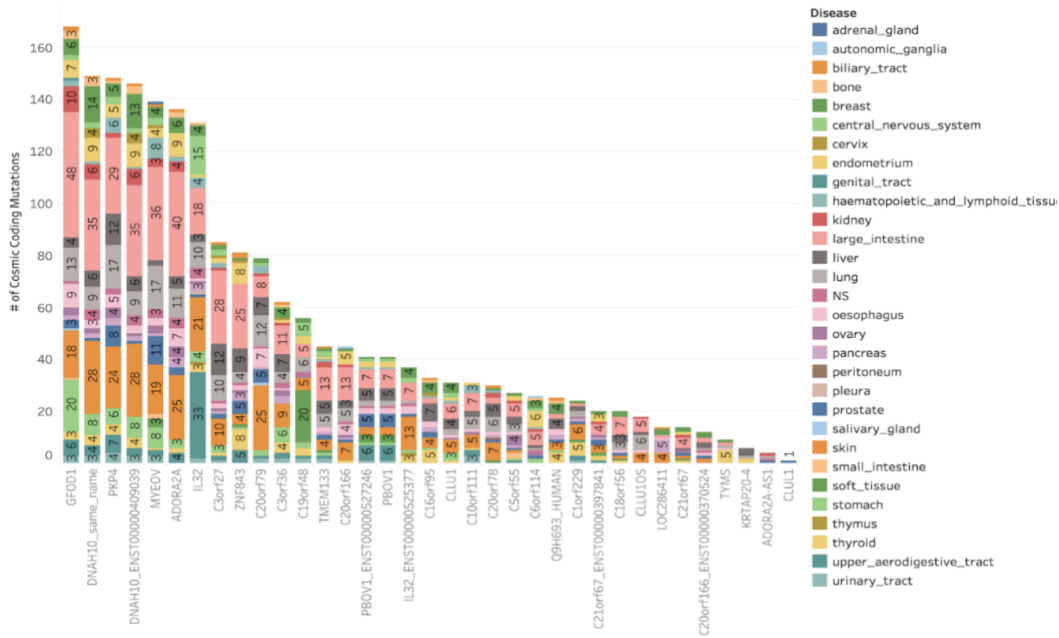

## Supplementary Figure 2d

Pseudo\_cord\_trans

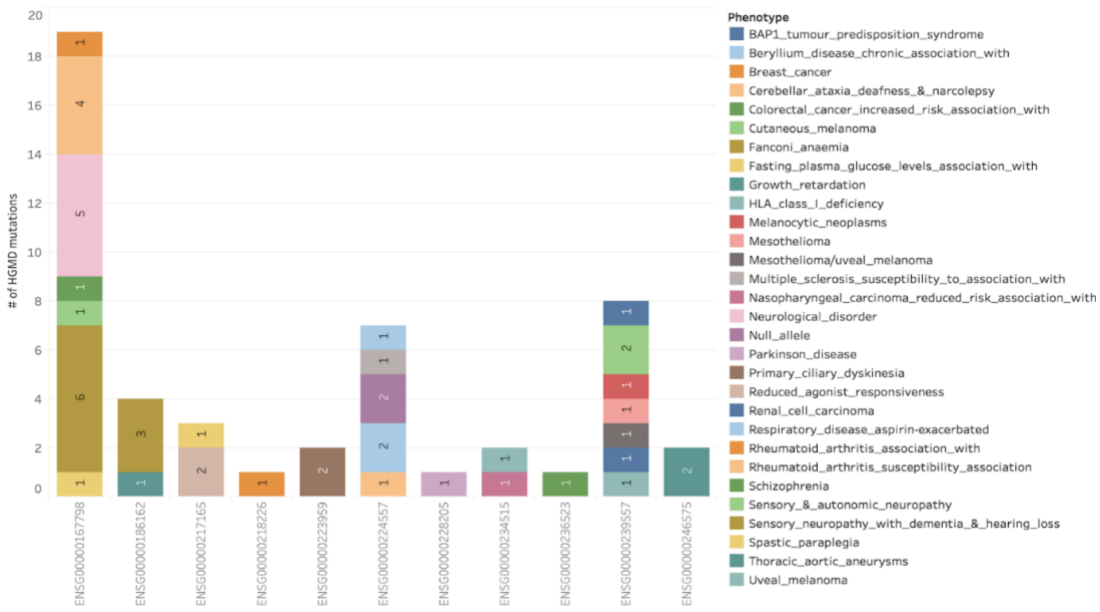

**Supplementary Figure 2. Known mutations in proteins encoded by the nORFs.** Mutations from COSMIC and HGMD databases were mapped to both entire nORFs genomic and specifically to novel protein amino acid sequence coordinates and represented as described below. **a.** Noncoding mutations from COSMIC were mapped to all sORFs genomic coordinates and only the top 21 sORFs with the highest number of mutations are represented here. Sizes of the pie charts indicate the number of variants that mapped to sORFs for each disease and the color indicates the pathogenicity (FATHMM, higher the score, more the pathogenicity). **b.** Mutations from the HGMD database were mapped to sORFs and only the top 17 mutations are represented here. Sizes of the pie charts indicate the number of variants that mapped to sORFs for each disease and the color indicates the type of HGMD variants. DM, disease-causing mutations; DM? denoting a probable pathological mutation; DP, disease-associated polymorphisms; FP, functional polymorphisms. **c.** Coding mutations from COSMIC are mapped to all Denovogenes and are represented. **d.** Mutations from HGMD are mapped to pseudogenes that are known to be translated.

### Supplementary Figure 3

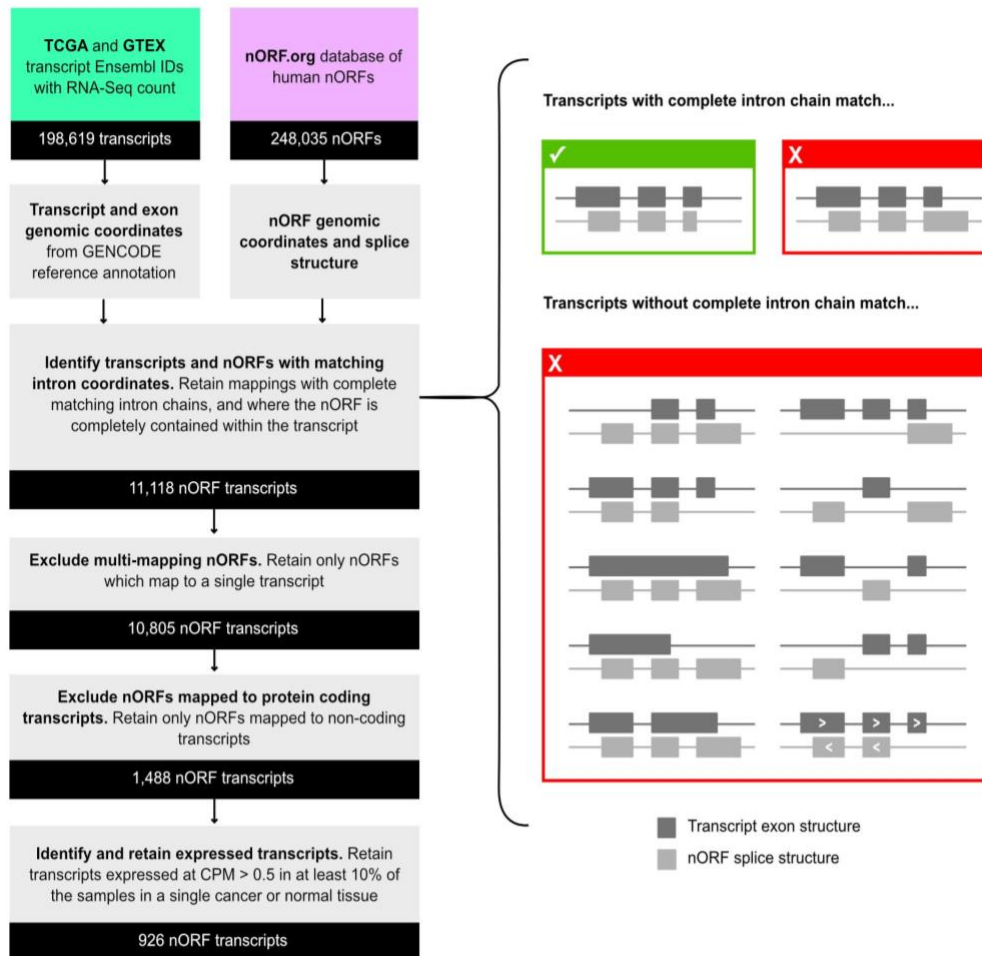

### Supplementary Figure 3. Identifying expressed transcripts encoding novel open reading frames.

Computational pipeline used to identify transcripts containing novel open reading frames, and the types of mapping between nORF and transcript genomic coordinates accepted and rejected in this pipeline.

# Supplementary Figure 4

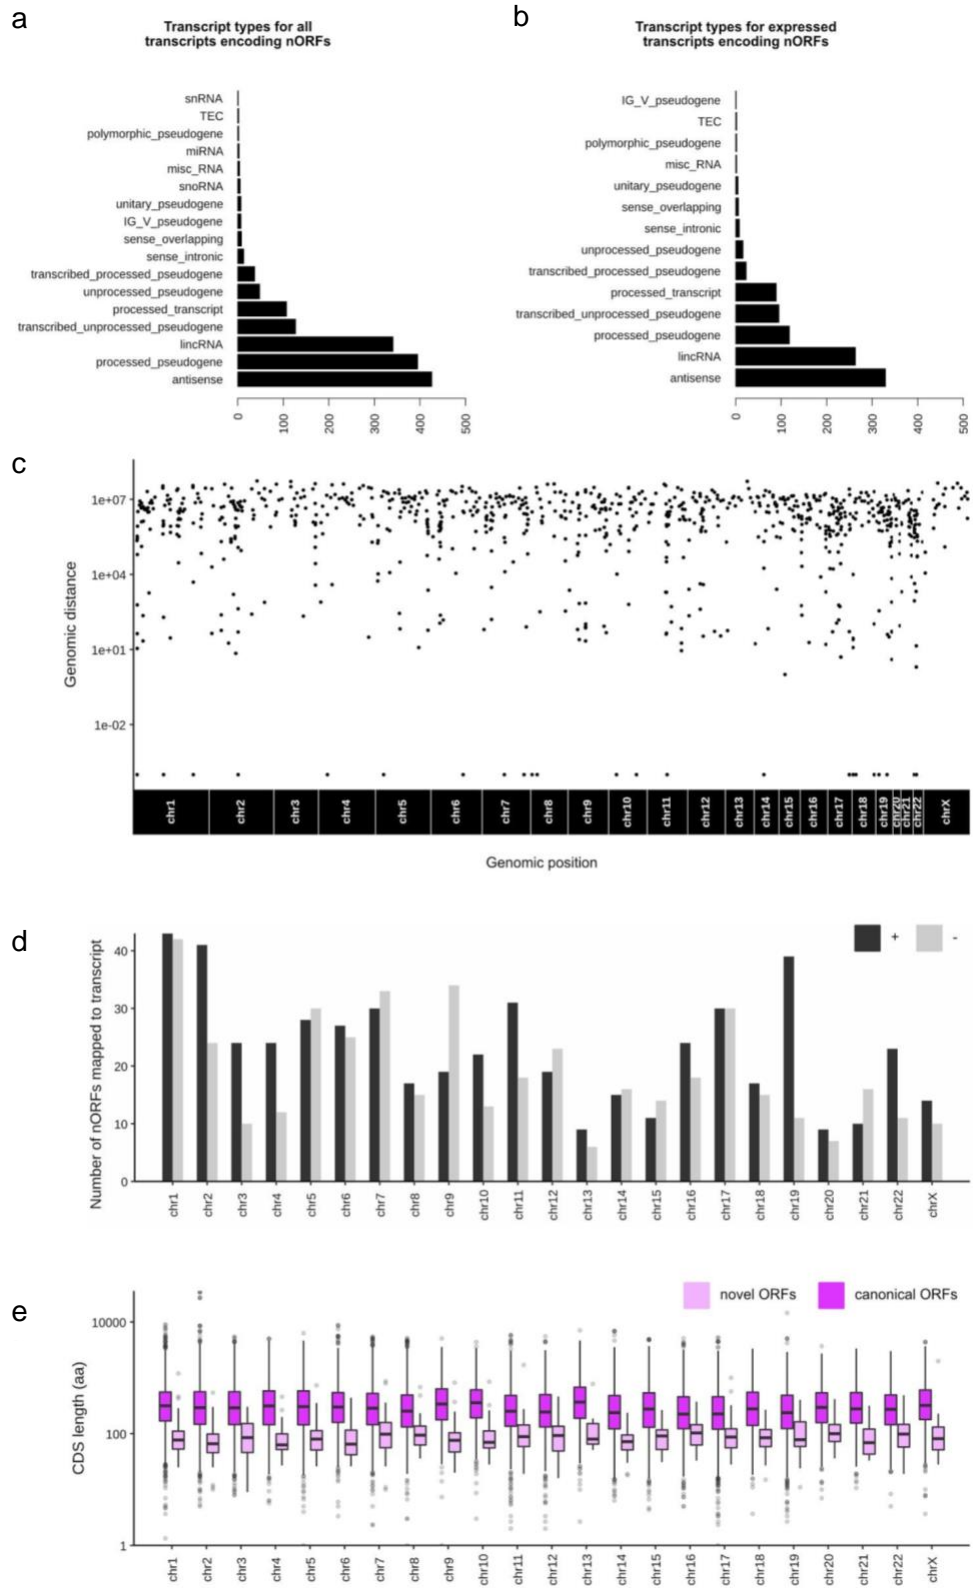



**Supplementary Figure 4. Identifying expressed transcripts encoding novel open reading frames.** Frequency of canonical transcript Ensembl biotypes for noncoding transcripts containing nORFs, for **a.** all nORF transcripts and **b.** expressed nORF transcripts considered in this study. **c.** Rainfall graph showing the genomic distribution of expressed nORF transcripts, measured in nucleotides from the nORF start site, with a pseudo-count of 0.0001. **d.** Frequency of expressed nORF transcripts by chromosome and strand. **e.** Distribution of ORF length for novel and canonical ORFs, by chromosome.

## Supplementary Figure 5

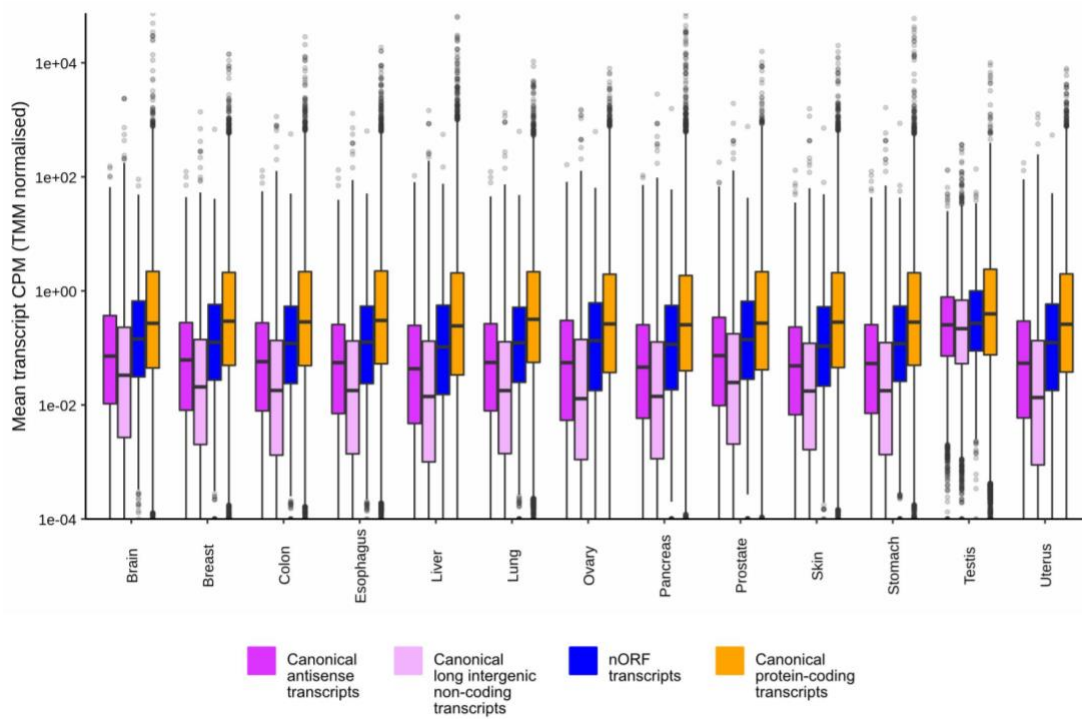

**Supplementary Figure 5. Expression of nORF transcripts in normal tissues.** Mean CPM value (TMM normalized) for nORF transcripts by tissue, log transformed with a pseudo-count of 0.0001. Mean expression of nORF transcripts compared with protein coding, long intergenic non-coding and antisense transcripts across GTEx normal tissues.

### Supplementary Figure 6a

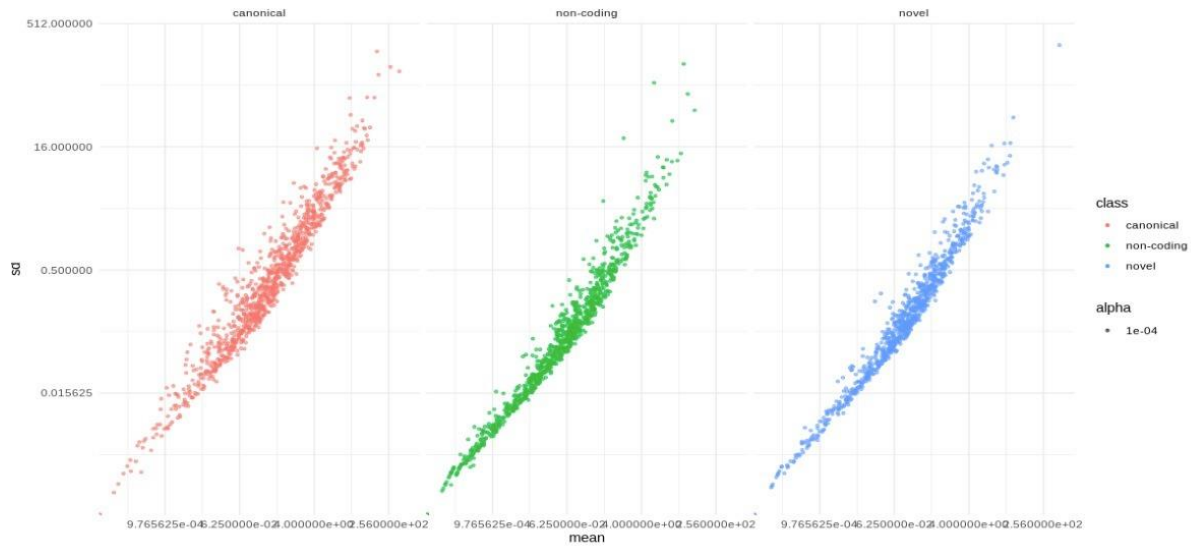

### Supplementary Figure 6b

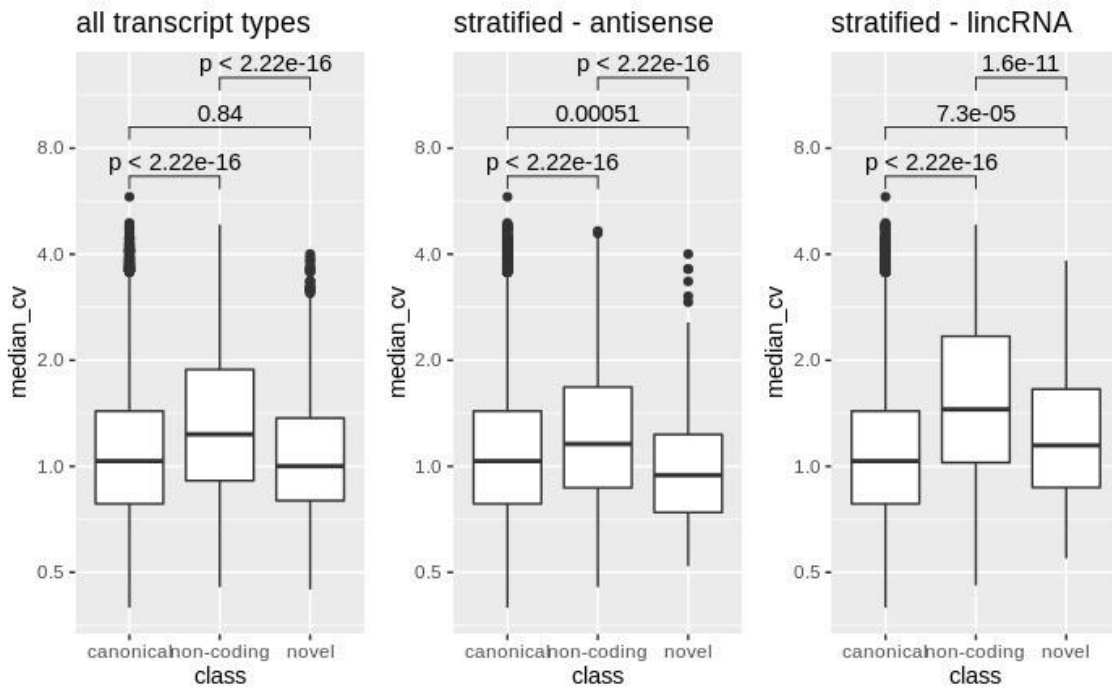

**Supplementary Figure 6. Transcript expression across GTEx tissues.** Means and standard deviations for TMM normalized expression counts (CPM) are calculated tissue-wise across all tissues included from the GTEx dataset and a median coefficient of variation (CV) is calculated from tissue-wise variations. Transcripts are classified as canonical protein coding, non-coding or novel based on the

workflow presented in Supplementary Figure 3, Supplementary Figure 4a and as detailed in Methods. **a.** Tissue-wise mean and standard deviation for lung tissue - a random sample of 1000 transcripts from each class is shown to limit overplotting. **b.** CV distributions for each transcript class are compared using a non-parametric Wilcoxon statistical test, and p-values are displayed. Transcript subsets for 'non-coding' and 'novel' transcripts are produced by stratifying by transcript type, and CV comparisons for antisense and lincRNA transcripts are performed in isolation.

# Supplementary Figure 7

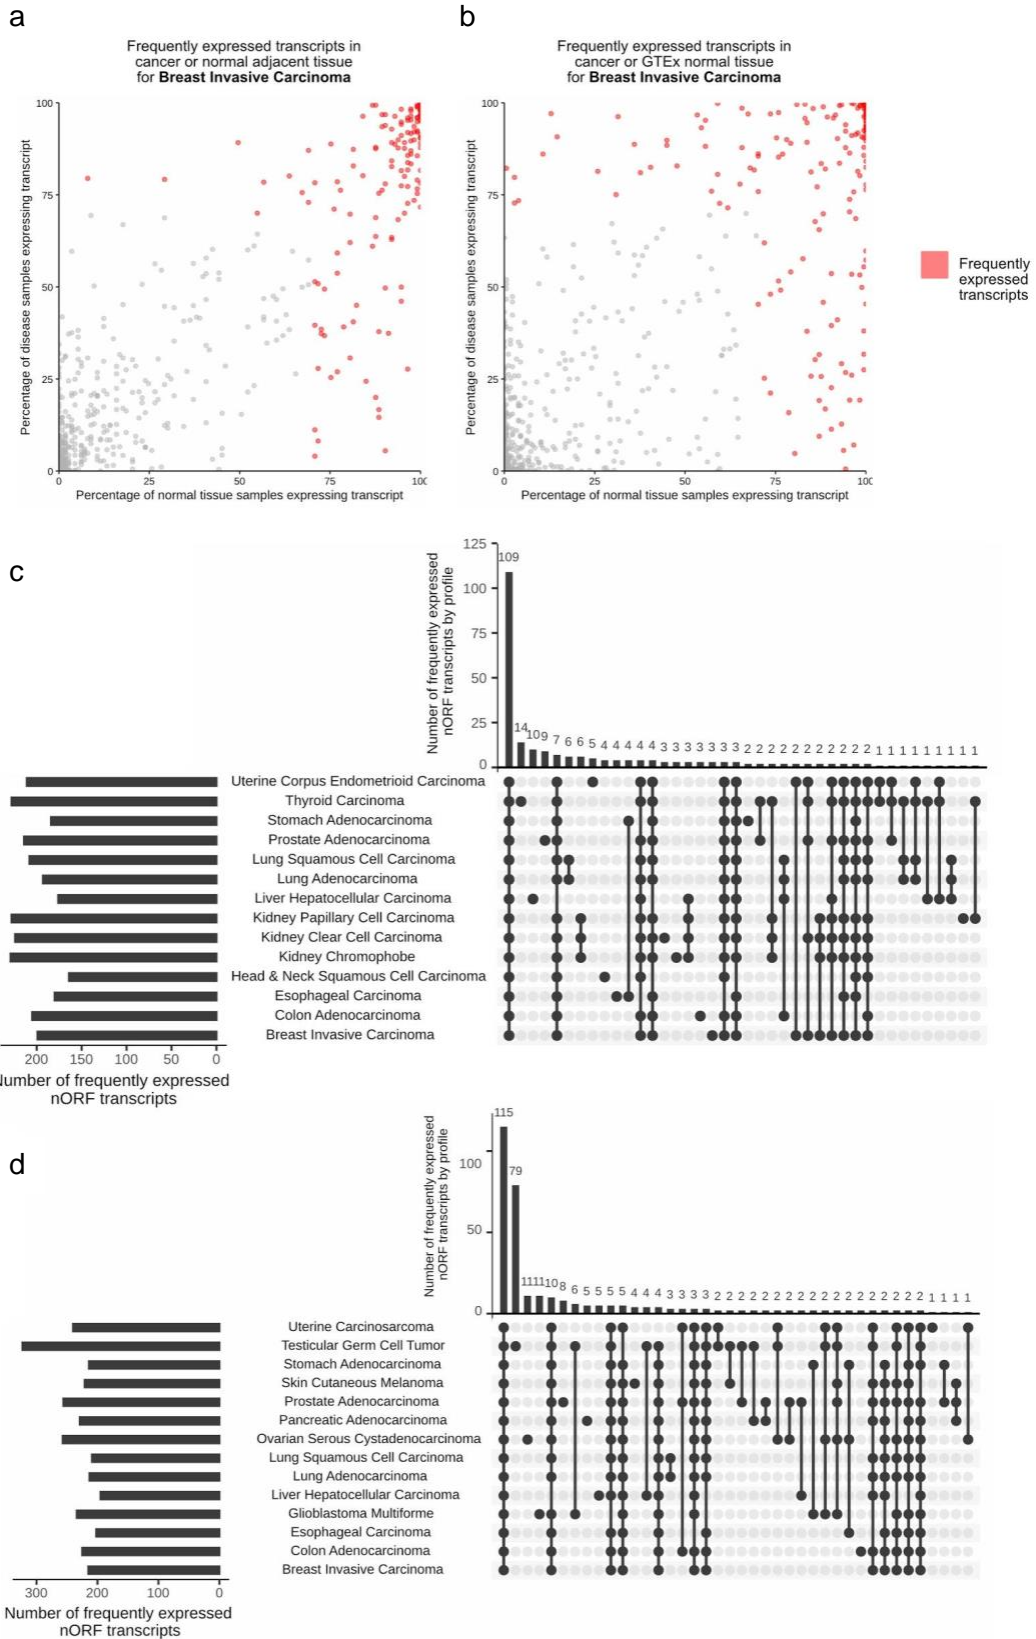

**Supplementary Figure 7. Frequently expressed nORF transcripts across cancer and normal reference samples.** Percentage of samples exhibiting transcript expression greater than 0.5 CPM for each expressed nORF transcript. Representative plot shown for breast invasive carcinoma tissue compared with **a.** normal adjacent tissue **b.** GTEx normal tissue. nORF transcripts identified as frequently expressed are highlighted. Profiles of frequently expressed nORF transcripts across cancer types, considering **c.** cancer and normal adjacent tissue and **d.** cancer and GTEx normal tissue.

## Supplementary Figure 8a

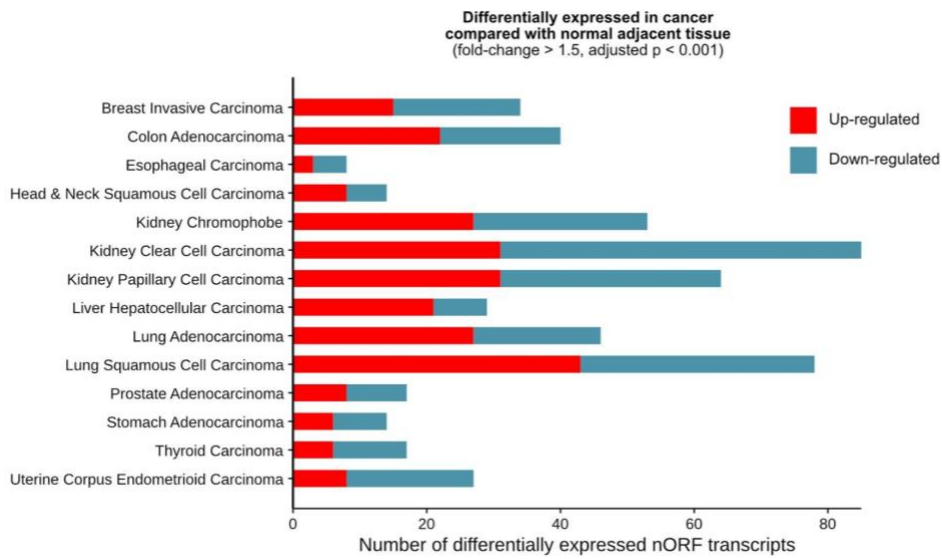

## Supplementary Figure 8B

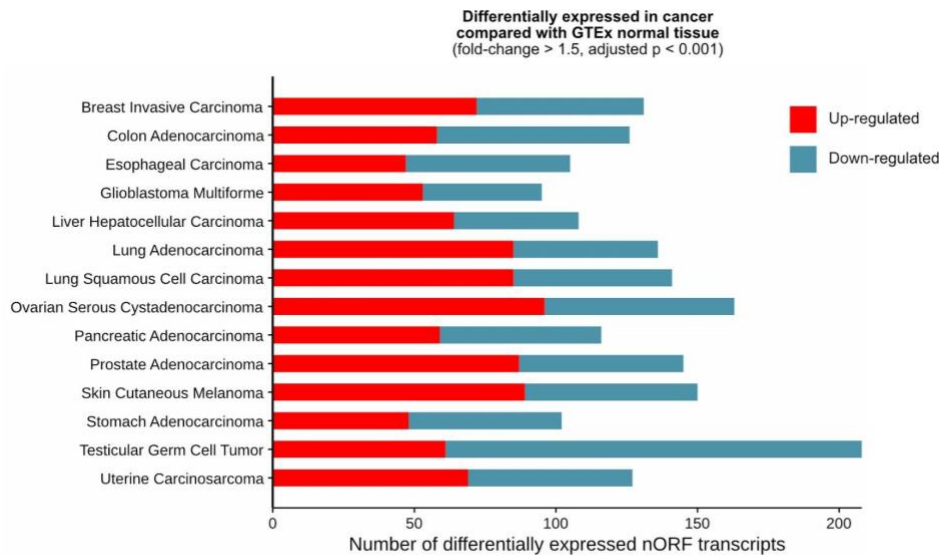

## Supplementary Figure 8c

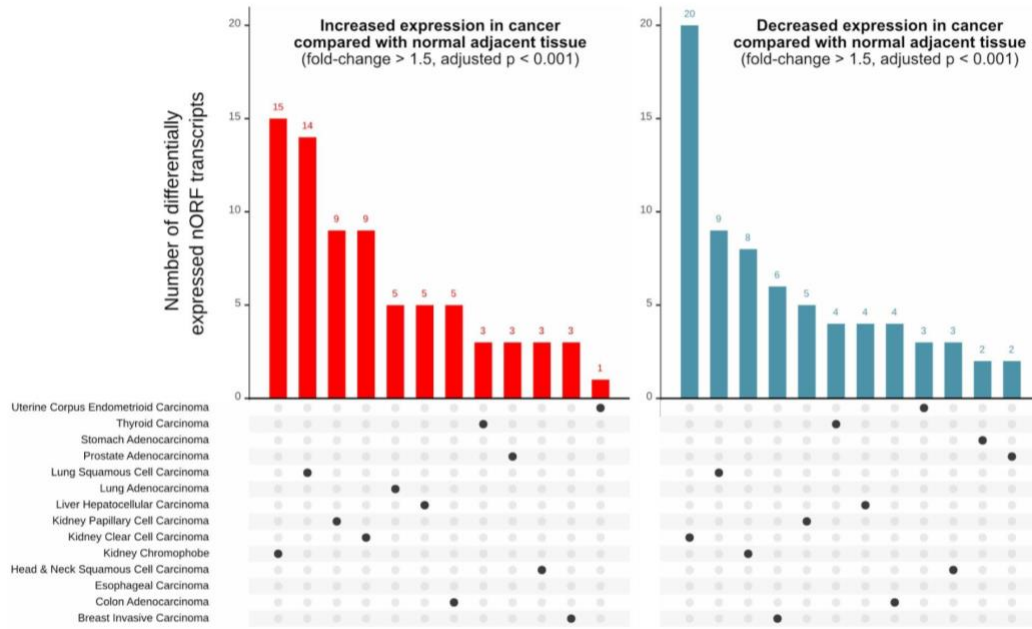

## Supplementary Figure 8d

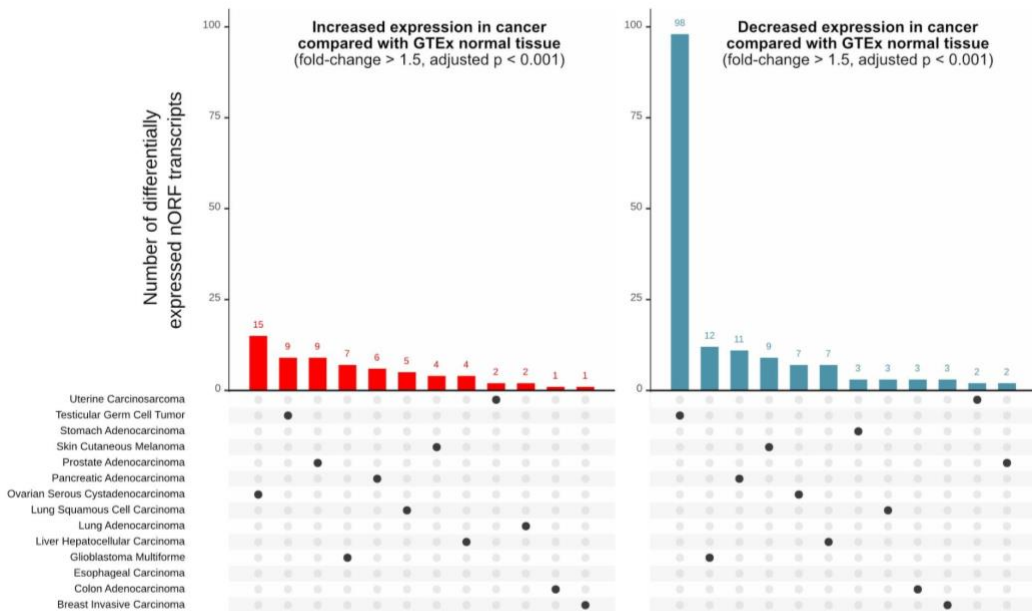



## Supplementary Figure 8e

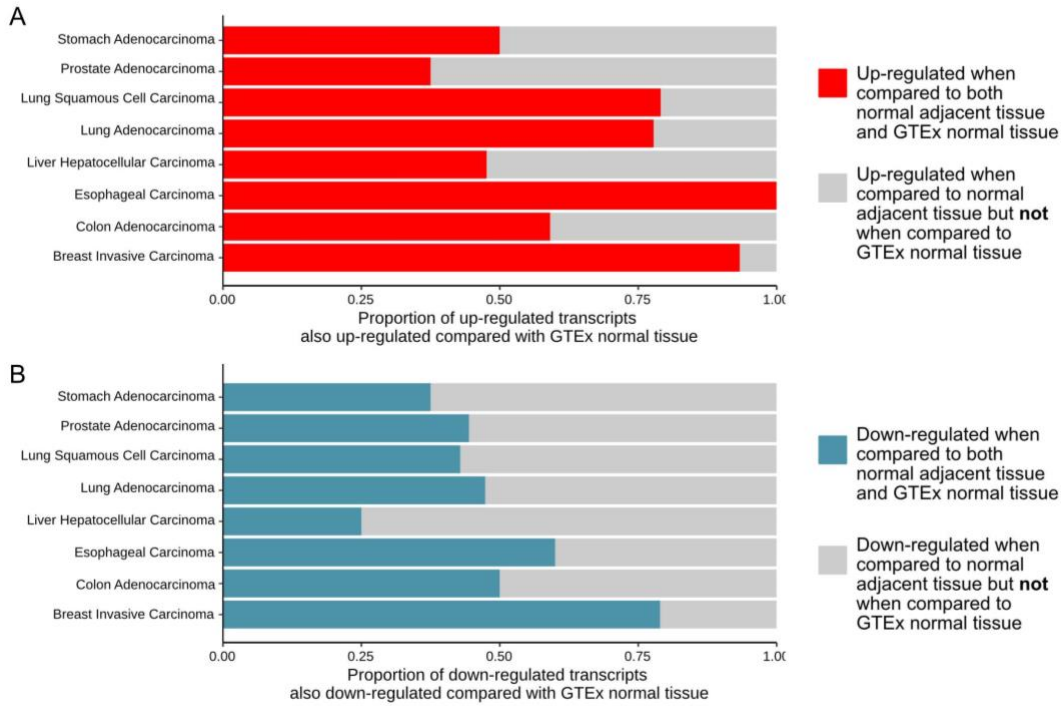

## Supplementary Figure 8f

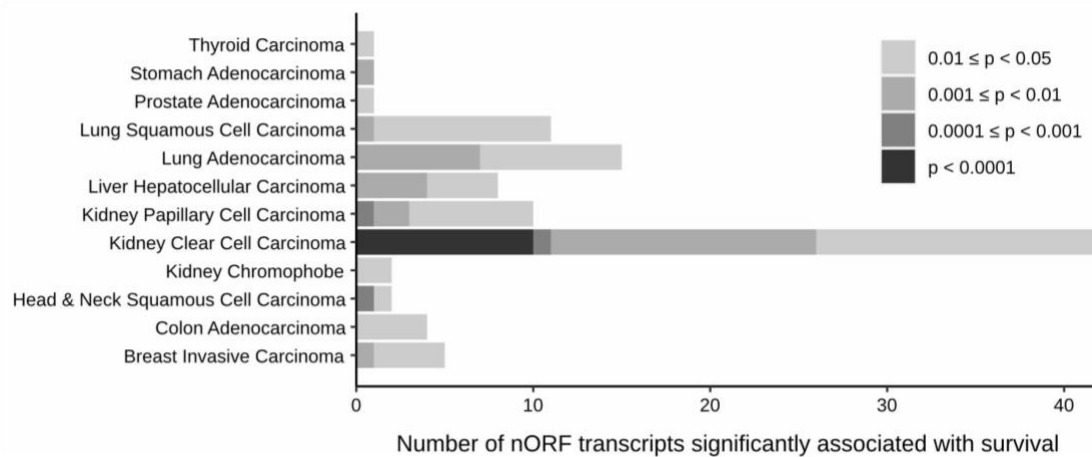

## Supplementary Figure 8g

### Liver Hepatocellular Carcinoma

|   | Transcript        | nORF ID | Transcript type      | Fold change compared with normal adjacent tissue | Survival adjusted p value | Survival hazard ratio |
|---|-------------------|---------|----------------------|--------------------------------------------------|---------------------------|-----------------------|
| A | ENST00000413077.1 | hglvH5  | processed_transcript | 2.75                                             | 0.028                     | 0.59                  |
| B | ENST00000489336.5 | io5aH5  | processed_transcript | 2.25                                             | 0.006                     | 0.55                  |

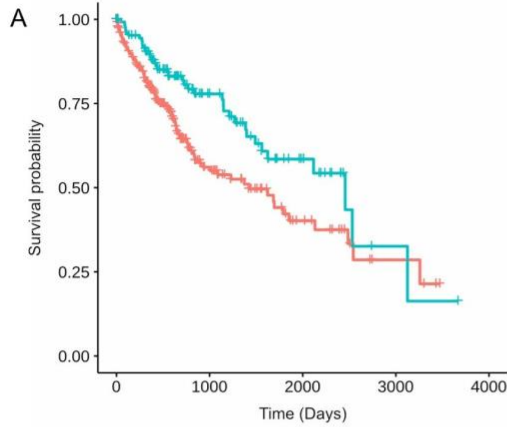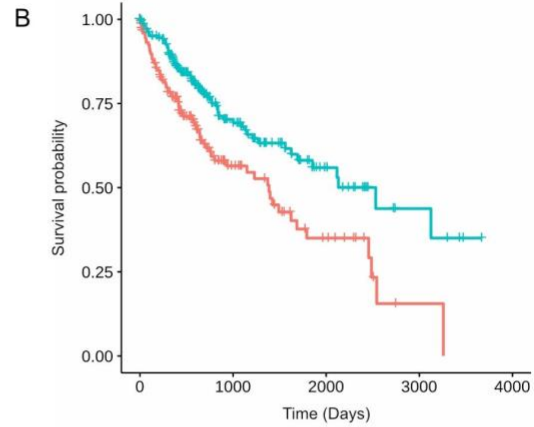

### Lung Adenocarcinoma

|   | Transcript        | nORF ID       | Transcript type | Fold change compared with normal adjacent tissue | Survival adjusted p value | Survival hazard ratio |
|---|-------------------|---------------|-----------------|--------------------------------------------------|---------------------------|-----------------------|
| C | ENST00000536835.2 | gbjoH1        | antisense       | 3.07                                             | 0.008                     | 0.61                  |
| D | ENST00000480284.1 | tracer_102312 | lincRNA         | 34.30                                            | 0.046                     | 0.67                  |

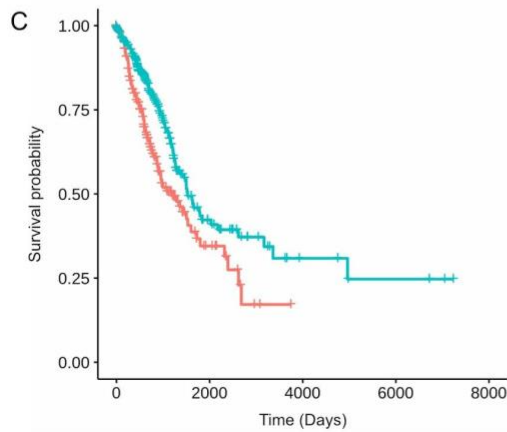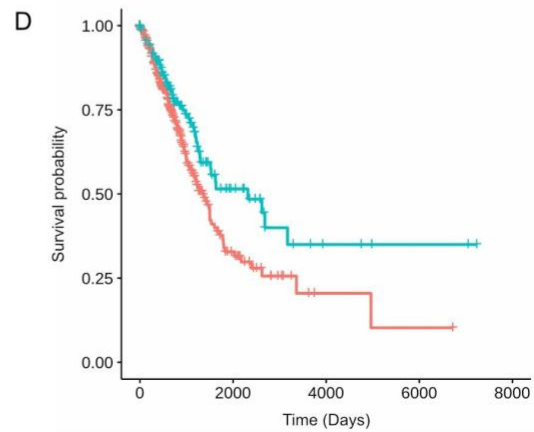

■ High expression group
 ■ Low expression group

**Supplementary Figure 8. Differentially expressed nORF transcripts in cancer, corresponding analysis using a fold change threshold of 1.5, with associated survival analysis.** **a.** total number of differentially expressed nORF transcripts by cancer type compared with NAT **b.** total number of differentially expressed nORF transcripts by cancer type compared with GTEx **c.** nORF transcripts uniquely up- or down-regulated in a single cancer type compared with NAT. **d.** nORF transcripts uniquely up- or down-regulated in a single cancer type compared with GTEx normal tissue. **e.** Reproducibility of differential expression results using normal adjacent tissue and GTEx normal tissue. nORF transcripts identified as differentially expressed when comparing cancer tissue with normal adjacent tissue, showing the proportion of nORF transcripts also differentially expressed when comparing cancer tissue with GTEx tissue (**upper:** up-regulated nORF transcripts, **lower:** down-regulated nORF transcripts) **f.** Association of nORF transcript expression with overall patient survival. Number of differentially expressed nORF transcripts significantly associated with survival at different adjusted p value thresholds, by cancer type. **g.** Kaplan Meier curves showing overall patient survival in high and low expression groups for reproducibly differentially expressed nORF transcripts. Showing Kaplan Meier curves, nORF transcript ID and further transcript details for four nORF transcripts uniquely and reproducibly up-expressed in a single disease, and where high expression is associated with poor prognosis. The cohort was divided into high and low nORF transcript expression groups using the Maximally Selected Rank Statistic, and Kaplan Meier survival curves were generated with a 95% confidence interval. Survival probabilities were compared using the log-rank test and p values adjusted for multiple testing. Overall survival times were fitted to a Cox proportional hazards regression model and hazard ratio calculated from the fitted coefficients.

Supplementary Figure 9a

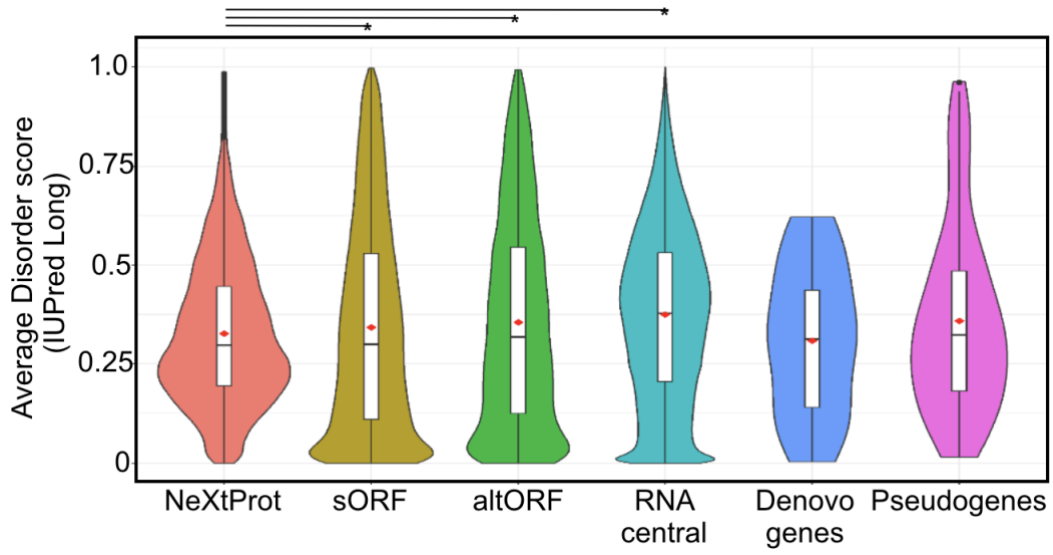

Supplementary Figure 9b

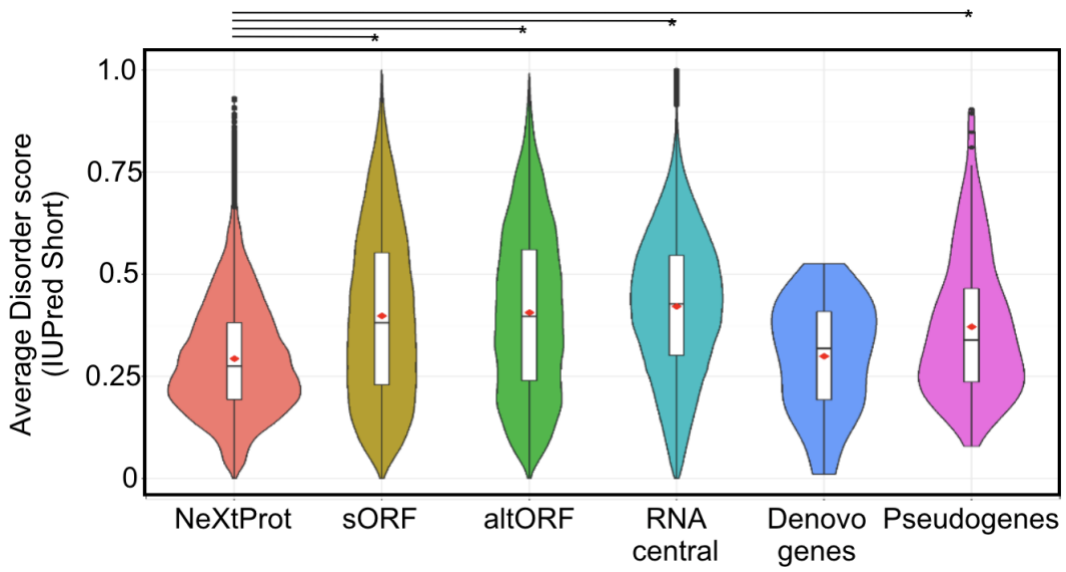

## Supplementary Figure 9c

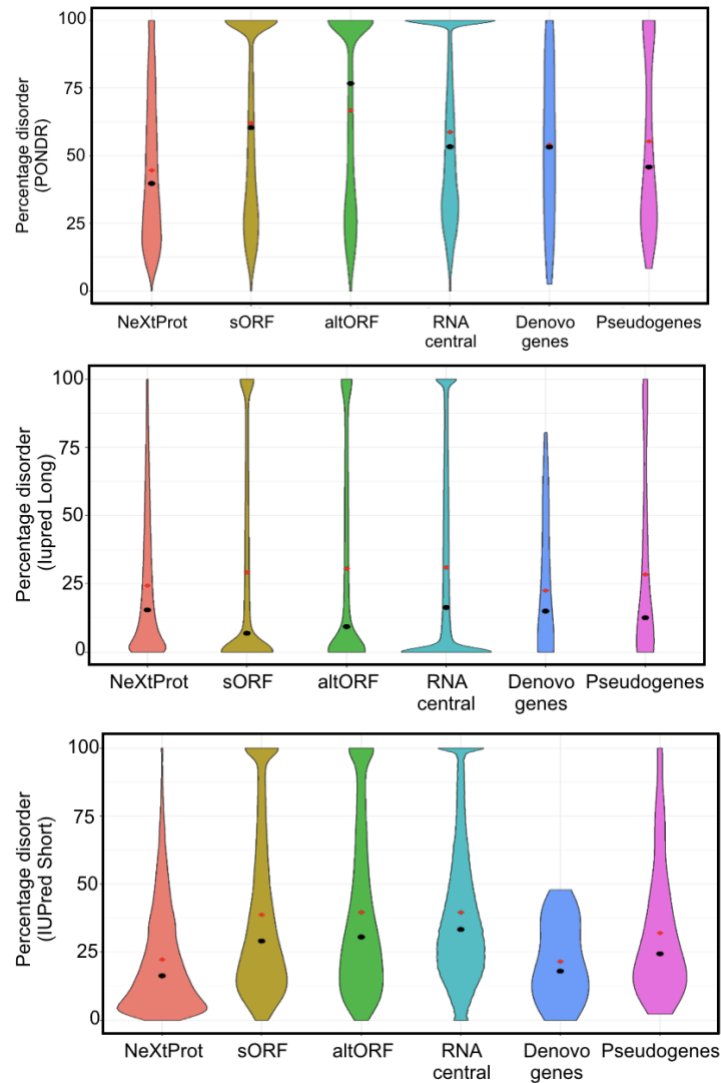

**Supplementary Figure 9. Prediction of disorder in proteins encoded by nORFs.** Average disorder scores of proteins in NeXtProt compared to average disorder scores of proteins encoded by nORFs, predicted by **a.** IUPred-Long, and **b.** IUPred-Short disorder predictors. **c.** Percentage of protein sequence identified to be disordered (amino-acid disorder score > 0.5) in NeXtProt, and each of the nORF datasets, for three prediction algorithms PONDR (top panel), IUPred-Long (middle panel) and IUPred-Short (bottom panel). Shown in red and black within each distribution are the mean and median respectively.

### Supplementary Figure 10a

| Dataset      | PONDR       |             | IUPred-Long |             | IUPred-Short |             |
|--------------|-------------|-------------|-------------|-------------|--------------|-------------|
|              | Mean        | Median      | Mean        | Median      | Mean         | Median      |
| NeXtProt     | 0.486-0.489 | 0.452-0.457 | 0.326-0.329 | 0.295-0.300 | 0.293-0.296  | 0.274-0.279 |
| sORF         | 0.593-0.596 | 0.554-0.560 | 0.341-0.344 | 0.297-0.302 | 0.397-0.399  | 0.380-0.384 |
| altORF       | 0.626-0.632 | 0.622-0.639 | 0.352-0.359 | 0.311-0.326 | 0.404-0.41   | 0.392-0.402 |
| RNA Central  | 0.549-0.550 | 0.520-0.520 | 0.375-0.375 | 0.378-0.378 | 0.422-0.422  | 0.428-0.428 |
| Denovo genes | 0.457-0.601 | 0.440-0.638 | 0.240-0.377 | 0.175-0.421 | 0.249-0.352  | 0.208-0.396 |
| Pseudogenes  | 0.535-0.601 | 0.44-0.564  | 0.325-0.393 | 0.273-0.361 | 0.346-0.396  | 0.310-0.370 |

### Supplementary Figure 10b

| Disordered sequences in NeXtProt < | p-value PONDR |            | p-value IUPred-Long |            | p-value IUPred-Short |            |
|------------------------------------|---------------|------------|---------------------|------------|----------------------|------------|
|                                    | Fisher test   | Chi-square | Fisher test         | Chi-square | Fisher test          | Chi-square |
| sORF                               | 0.00          | 0.00       | 0.00                | 0.00       | 0.00                 | 0.00       |
| haltORF                            | 0.00          | 0.00       | 0.00                | 0.00       | 0.00                 | 0.00       |
| RNA Central                        | 0.00          | 0.00       | 0.00                | 0.00       | 0.00                 | 0.00       |
| Pseudogenes                        | 0.01          | 0.02       | 0.06                | 0.00       | 0.00                 | 0.00       |
| Denovo genes                       | 0.40          | 0.66       | 0.56                | 0.96       | 0.90                 | 0.41       |

**Supplementary Figure 10. Statistical significance of predicted disorder scores. a.** 95% Bootstrap confidence Interval of the mean and median of disorder scores predicted using PONDR, IUPred-Long and IUPred-Short for each of the nORF datasets. **b.** Statistical significance (uncorrected p-values) for the enrichment of disordered sequences in nORF datasets, in comparison to NeXtProt.

## Supplementary Figure 11

| Dataset      | Overall | Num > 30AA | PONDR   | IUPred-Long | IUPred-Short |
|--------------|---------|------------|---------|-------------|--------------|
| NeXtProt     | 42024   | 41952      | 17449   | 7589        | 3363         |
| sORF         | 190195  | 92176      | 52213   | 25537       | 29543        |
| altORF       | 24676   | 19281      | 12037   | 5725        | 6523         |
| RNACentral   | 5185186 | 5185186    | 2807585 | 1534132     | 1778105      |
| Denovo genes | 26      | 26         | 12      | 5           | 1            |
| Pseudogenes  | 172     | 172        | 87      | 41          | 36           |

**Supplementary Figure 11. Number of nORFs investigated.** Table showing the number of protein sequences identified in each nORF dataset, number of sequences used for further analysis (Sequence length > 30) and the number of predicted disordered sequences (average disorder score > 0.5) obtained using PONDR, IUPred-Long and IUPred-short algorithms.

Supplementary Figure 12a

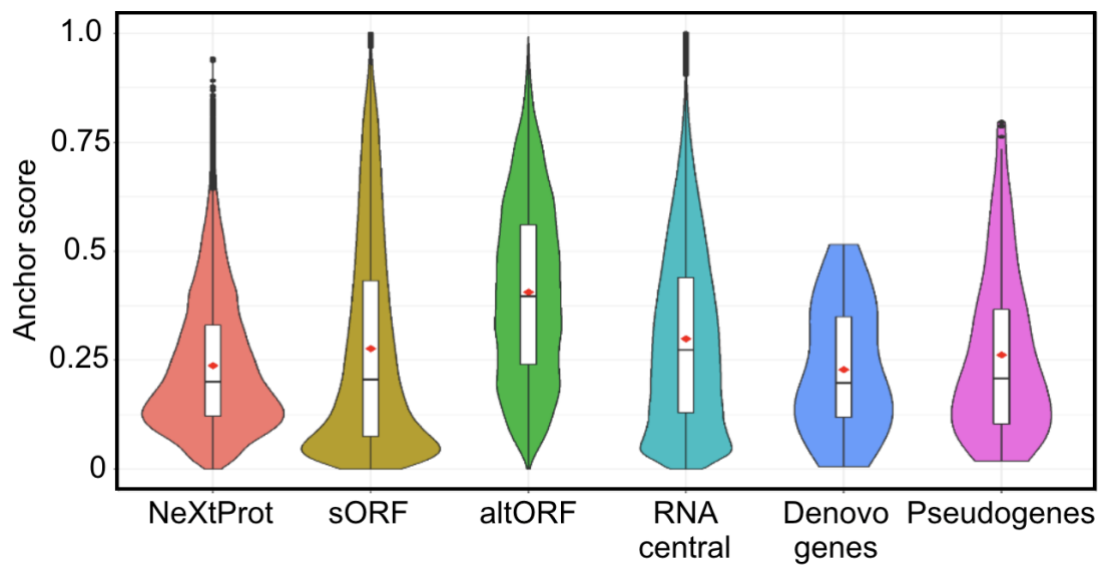



## Supplementary Figure 12b

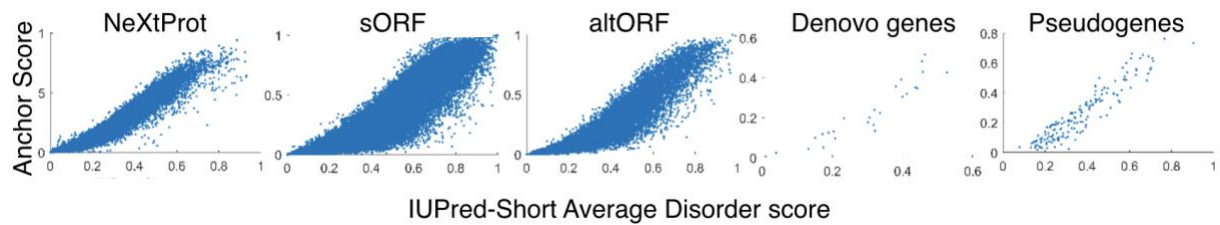

### Supplementary Figure 12. Anchor predictions of binding regions in proteins encoded by nORFs.

Anchor scores represent the average propensity of an amino acid in a disordered region to be part of a protein-protein binding site. **a.** Shown are the distributions of the predicted Anchor scores for known proteins in NeXtProt, and nORF peptides. As expected, the nORF proteins have higher mean Anchor scores in comparison to the NeXtProt database. **b.** Observed correlation between average Anchor score and IUPred-Short disorder prediction score for individual datasets.

### Supplementary Figure 13

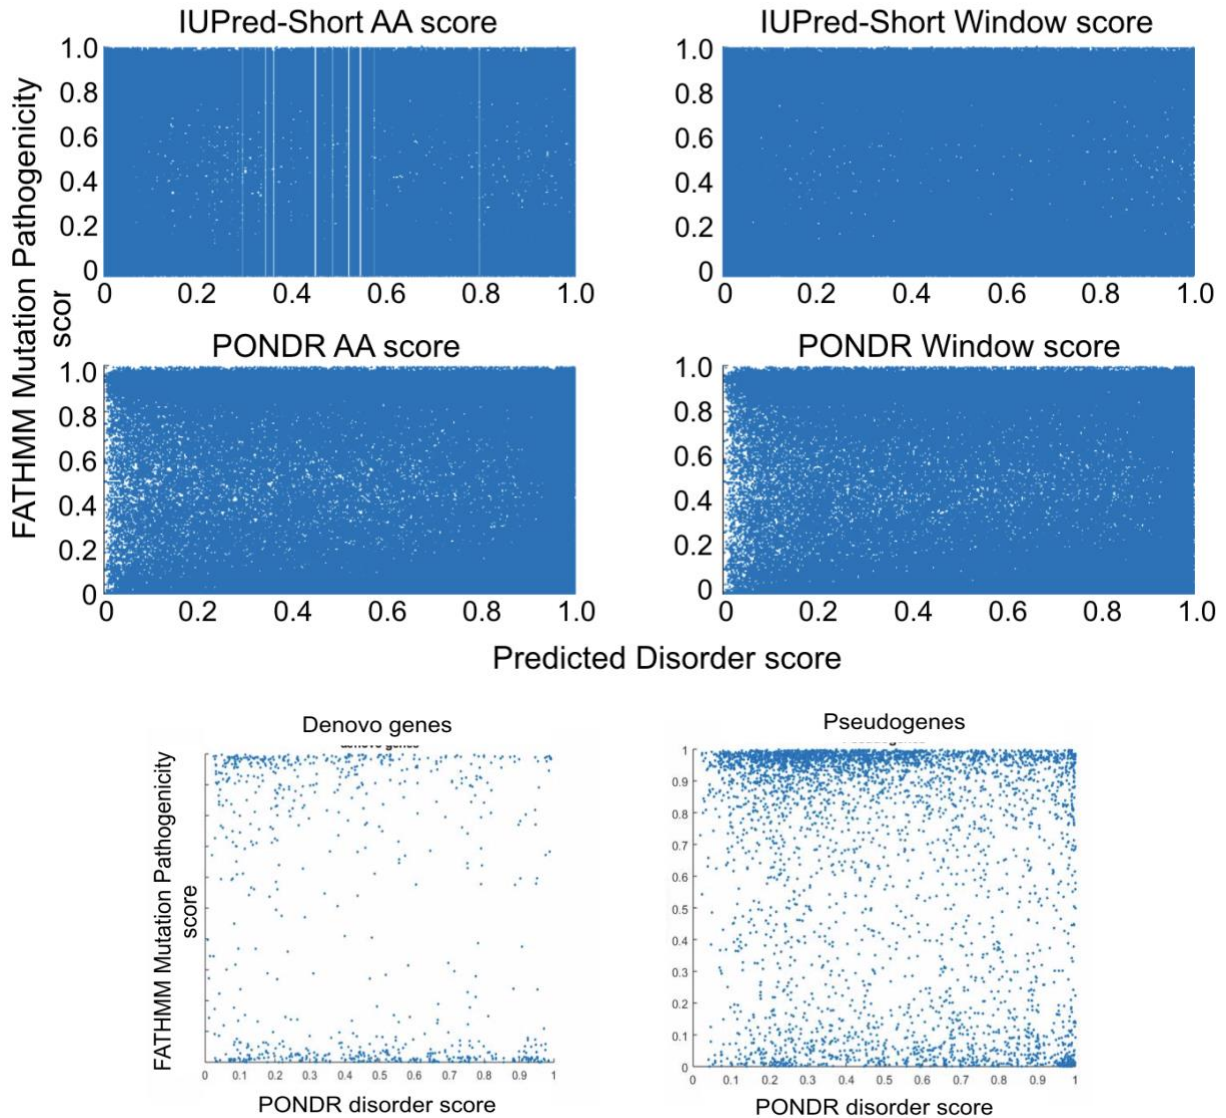

**Supplementary Figure 13. FATHMM pathogenicity scores vs predicted disorder scores for proteins encoded by nORFs.** We plotted FATHMM mutation pathogenicity scores for the proteins encoded by nORFs, against their corresponding disorder scores predicted using either PONDOR and IUPred. Disorder scores were computed at either amino-acid resolution, or for a 7-AA window around the mutated residue. The analysis did not reveal any correlation between FATHMM scores and predicted disorder scores for sORFs, Denovogenes or Pseudogenes.

## Supplementary Figure 14

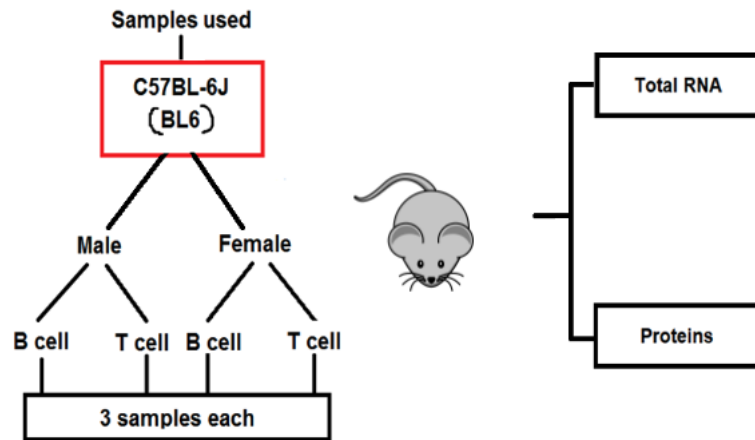

**Supplementary Figure 14. Extraction of total RNA and proteins from mouse B and T cells.** Naive B and T cells were isolated from the spleen of two sets of six male and six female C57BL/6J mice that were 12 weeks old using FACS. From one set, total RNA was extracted from each of the 12 samples (three B-male, three B-female, three T-male and three T-female) and sequenced. From another set, proteins were extracted and proteins from the same sub-group (B-male, B-female, T-male or T-female) were pooled together for mass spectrometry analysis. Hence, for RNA there are three biological replicates; whereas, for proteins there is only one biological replicate.

## Supplementary Figure 15

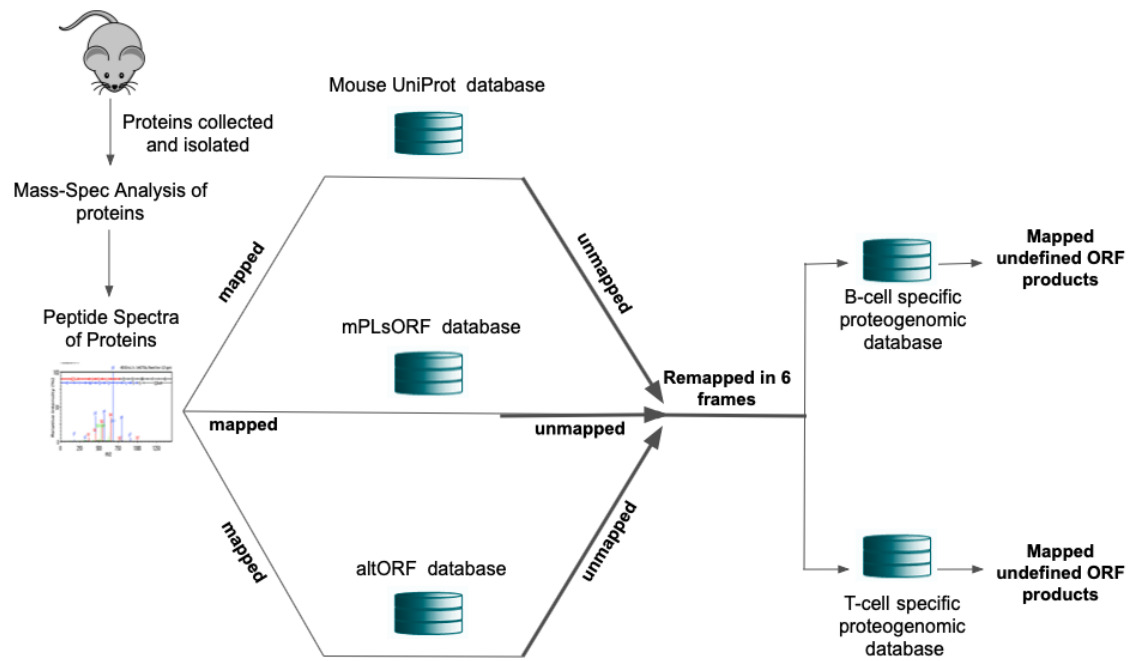

**Supplementary Figure 15. Proteogenomic workflow to identify non canonical translated products in mouse B and T cells.** Illustrates the schematic workflow of our proteogenomic analysis. Briefly, mass spectra of proteins obtained from mouse B and T cells were independently and sequentially mapped to the following databases in this order (a) mouse UniProt database, (b) an in-house curated sORF database, and (c) the mouse altORF database. Unmapped peptides were remapped to a B and T cell-specific proteogenomic nucleotide database to identify other undefined ORFs.

## Supplementary Figure 16

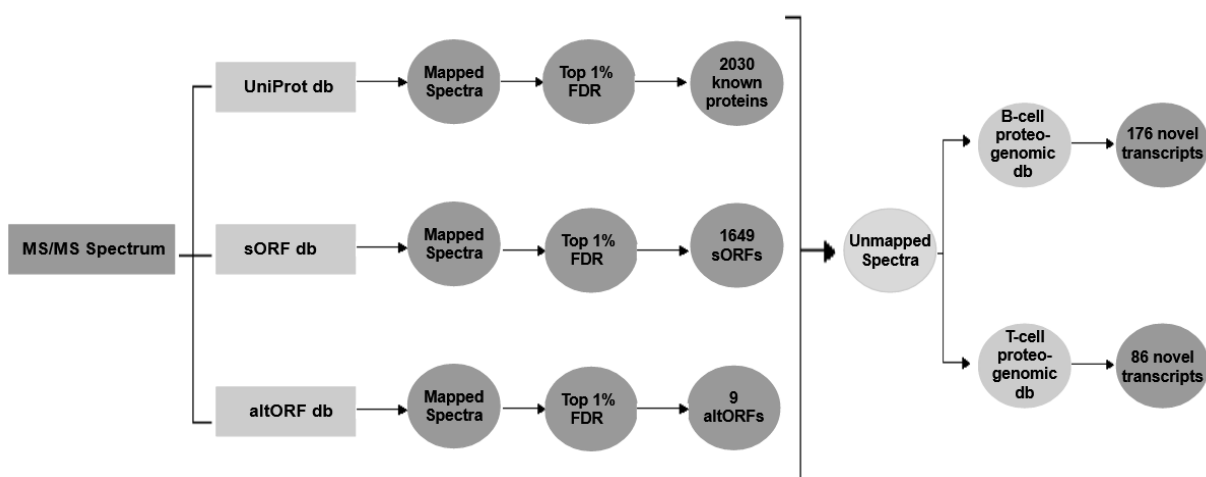

**Supplementary Figure 16. Schematic illustration of the proteogenomic workflow used to identify non canonical translated products in mouse B and T cells.** 2,030 known proteins, 9 altORFs, 1,649 sORFs, and 259 undefined novel ORF translated products were identified in mouse B and T cells using our proteogenomic workflow.

## Supplementary Figure 17

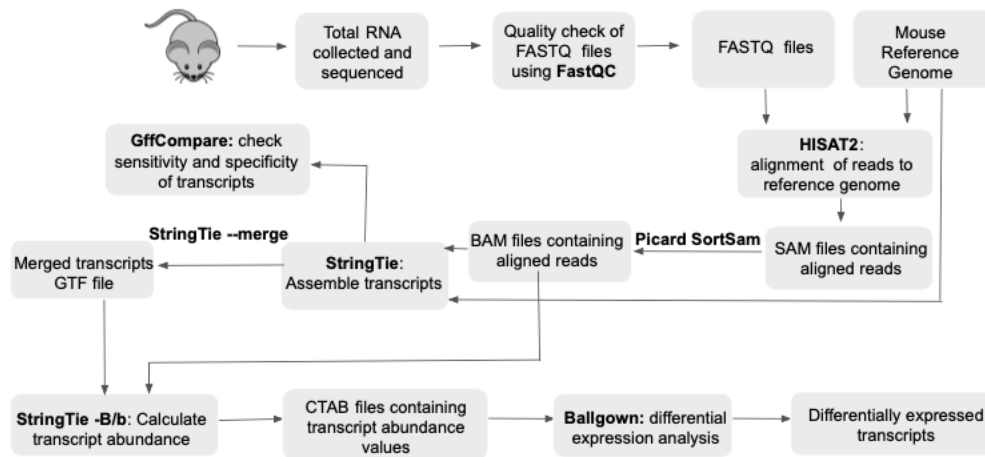

### Supplementary Figure 17. Workflow of transcript assembly and differential expression analysis.

Total RNA sequenced using Illumina HiSeq 2500 platform were assessed for their quality using FastQC. Read alignment was done using HISAT2, with FASTQ files and reference genome (GENCODE version M12) as inputs. The resulting SAM files containing the aligned reads were converted to BAM using Picard SortSam. Sample BAM files along with the reference genome were used as inputs for transcript assembly using StringTie, for which the assembled transcript quality was assessed using GffCompare. Transcripts assembled across the 12 samples were merged using the StringTie merge function for accurate transcript identification and downstream analysis. StringTie run with the -B/b parameter, using the sample BAM files and the merged transcript list as the reference genome, produced 12 CTAB files for each sample containing details of sample-specific transcript expression levels. These CTAB files were utilised for differential expression analysis using Ballgown. For further details pertaining to each step, refer to the materials and method section.

## Supplementary Figure 18

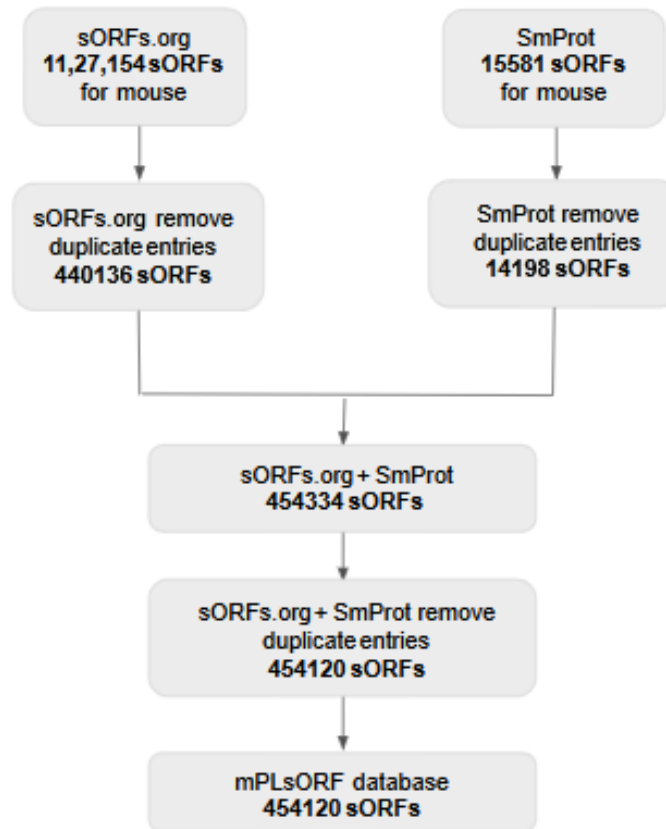

**Supplementary Figure 18. Creation of a sORF database.** Mouse sORFs for this work were obtained from two sources: sORFs.org containing 1,127,154 sORFs and SmProt containing 15,581 sORFs. Every entry in each of these datasets were individually filtered to remove duplicates resulting in 440,136 sORFs in sORFs.org and 14,198 sORFs in SmProt, finally resulting in 454,120 sORF entries. Each of these sORFs were then assigned a unique identifier and relevant information about the sORFs including their genomic coordinates, strand information, source database, amino acid sequence and genomic annotation were added to create our mPLsORF database.

## Supplementary Figure 19

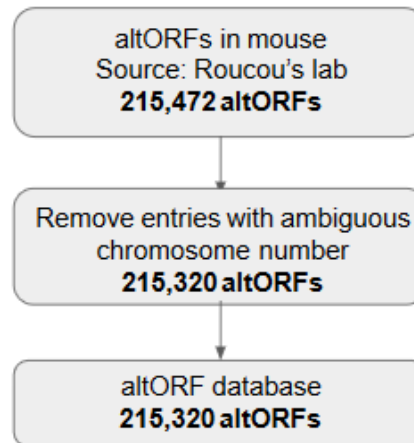

**Supplementary Figure 19. Creation of altORF database.** Information for the 215,472 mouse altORFs was downloaded from Xavier Roucou's lab, which were processed to remove entries with more than one designated chromosome. Strand information was ascertained separately and added to the database. This analysis resulted in a total of 215,320 altORFs that were used for our analysis.



## Supplementary Figure 20

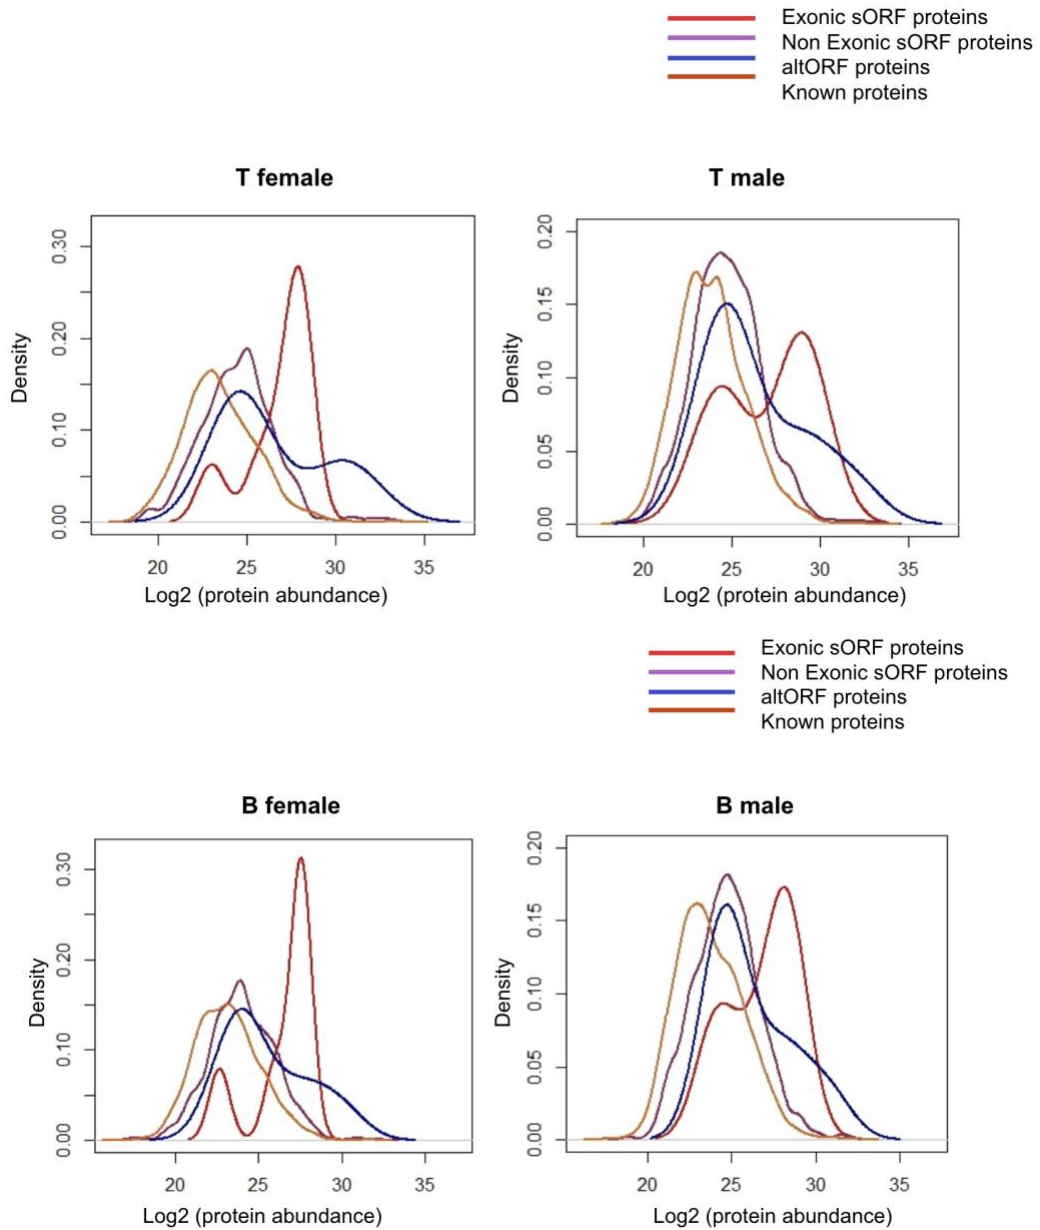

**Supplementary Figure 20. Protein abundance distribution plots for different cell groups.** Protein abundance plots calculated as log<sub>2</sub> of protein abundance (x-axis) is plotted against density (y-axis) to represent the distribution of protein abundances of exonic sORF (red), non exonic sORF (violet), altORF (blue) and known proteins (dark orange) for T female, T male, B female and B male.

**Supplementary Figure 21a**

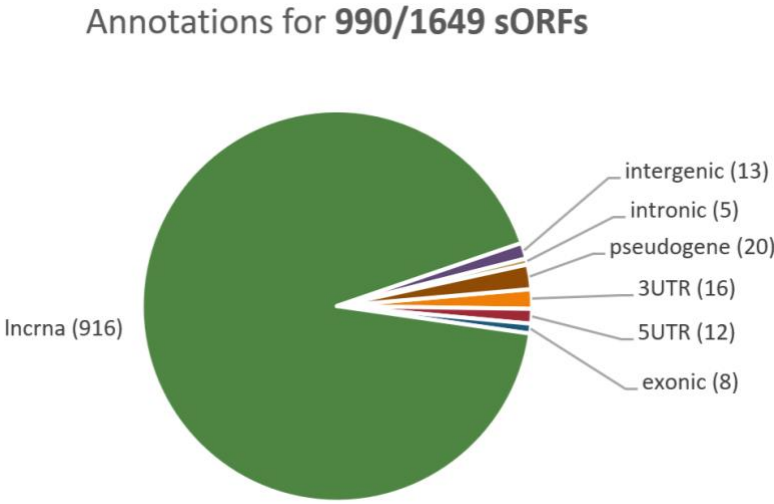

**Supplementary Figure 21b**

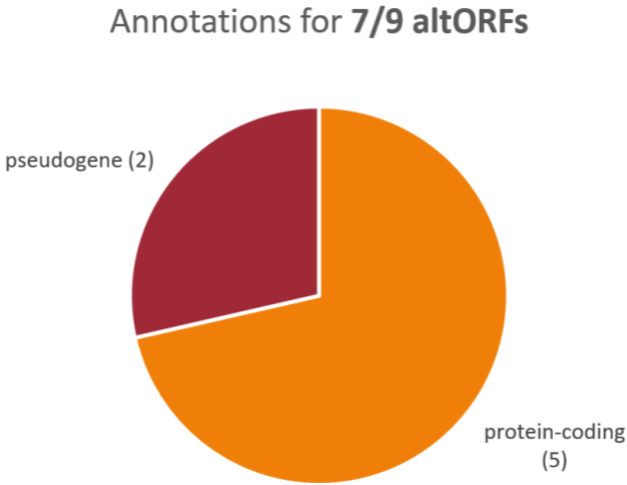

### Supplementary Figure 21c

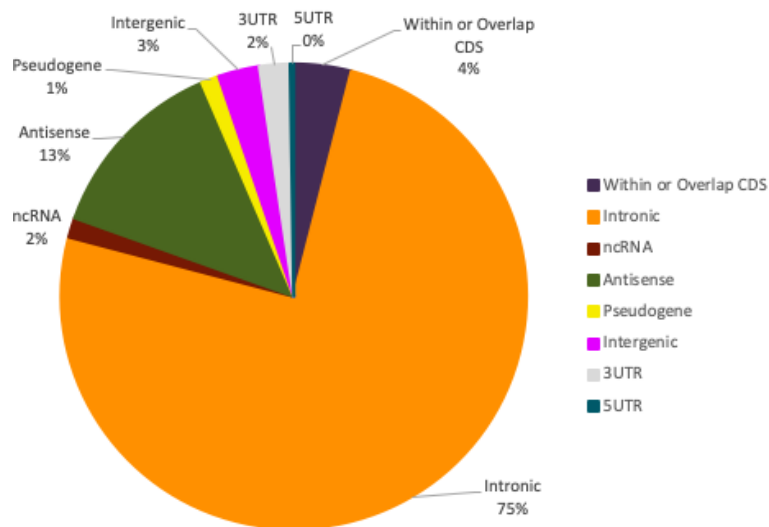

**Supplementary Figure 21. Genomic annotations for the different nORF categories found to be translated in B and T cells.** **a.** Pie chart with the different genomic annotations for 990/1649 sORFs. Most of the sORFs are within lncRNAs. **b.** Pie chart with the different genomic annotations for 7/9 altORFs. Most of the altORFs are within protein-coding regions. **c.** Pie chart with the different genomic annotations for 1373/1405 undefined ORFs. Most of the undefined ORFs are within introns.

## Supplementary Figure 22

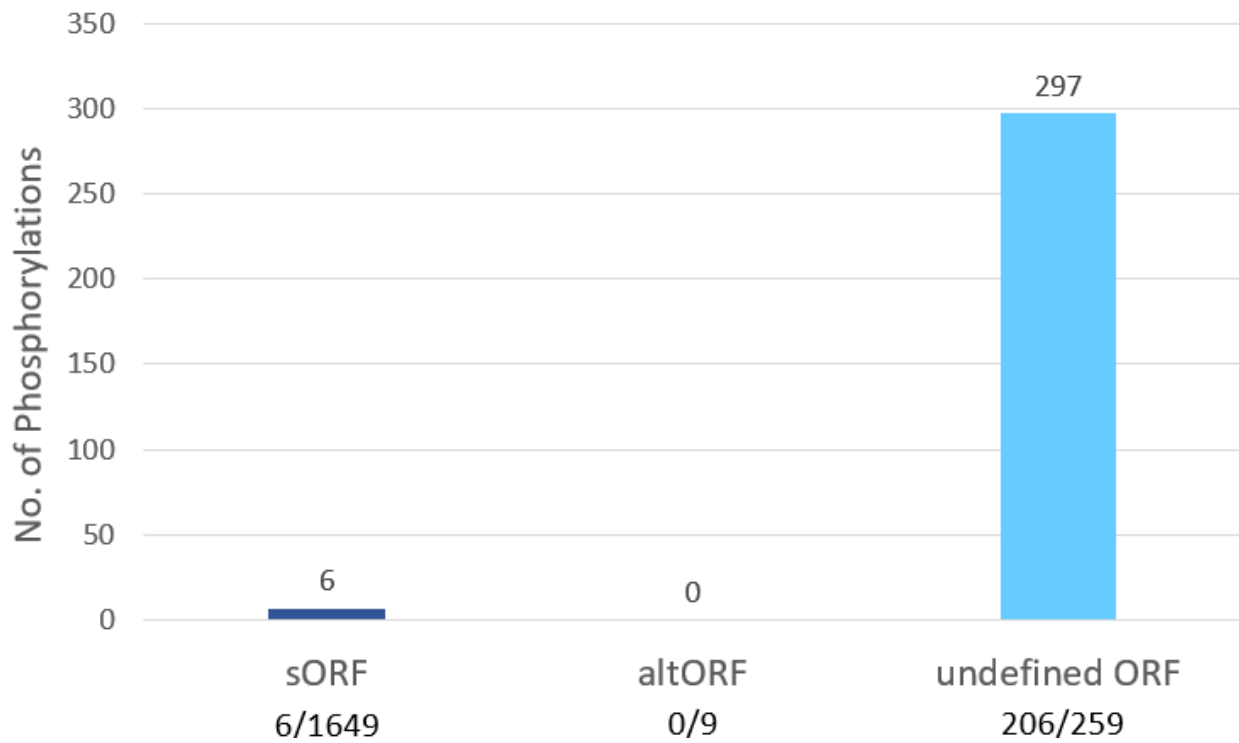

**Supplementary Figure 22. Phosphorylation modifications identified within translated nORFs in B and T cells.** Translated sORFs, altORFs and undefined ORFs identified in mouse B and T cells were evaluated for the number of phosphorylated sites. 6 sORFs and 206 undefined ORFs were found to contain at least 1 phosphorylated site.

### Supplementary Figure 23

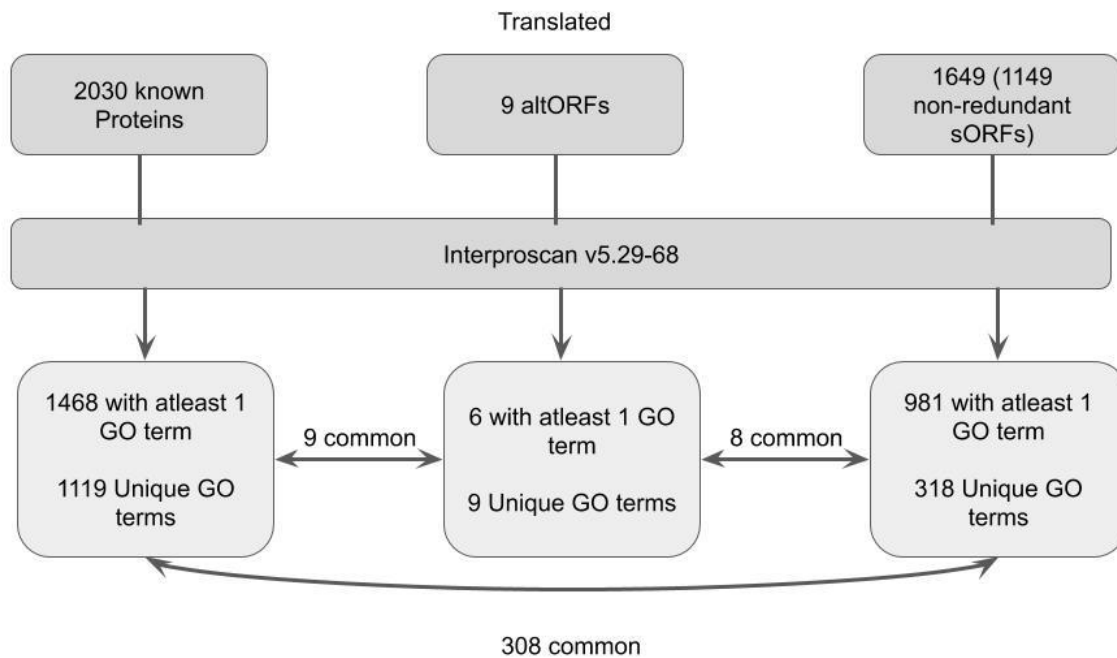

**Supplementary Figure 23. Workflow of GO annotation of altORFs and sORFs in preparation for GO analysis.** A list of amino acid sequences for all known proteins, altORFs, and sORFs with either transcription or translation evidence in at least 1 of the 12 samples was compiled and analyzed using Interproscan v5.29-68. GO annotations for the known proteins were also generated this way to ensure equal comparison between altORFs and sORFs which are unlikely to have GO annotations from other sources such as experimental methods. The list of 3493 GO terms from these known proteins was then used as the background list for subsequent GO enrichment analysis of sORFs. 490 GO terms present in known proteins were shared with sORFs, and all 73 terms found in altORFs were also present in the known proteins. However, only 46 terms were shared between sORFs and altORFs.

## Supplementary Figure 24

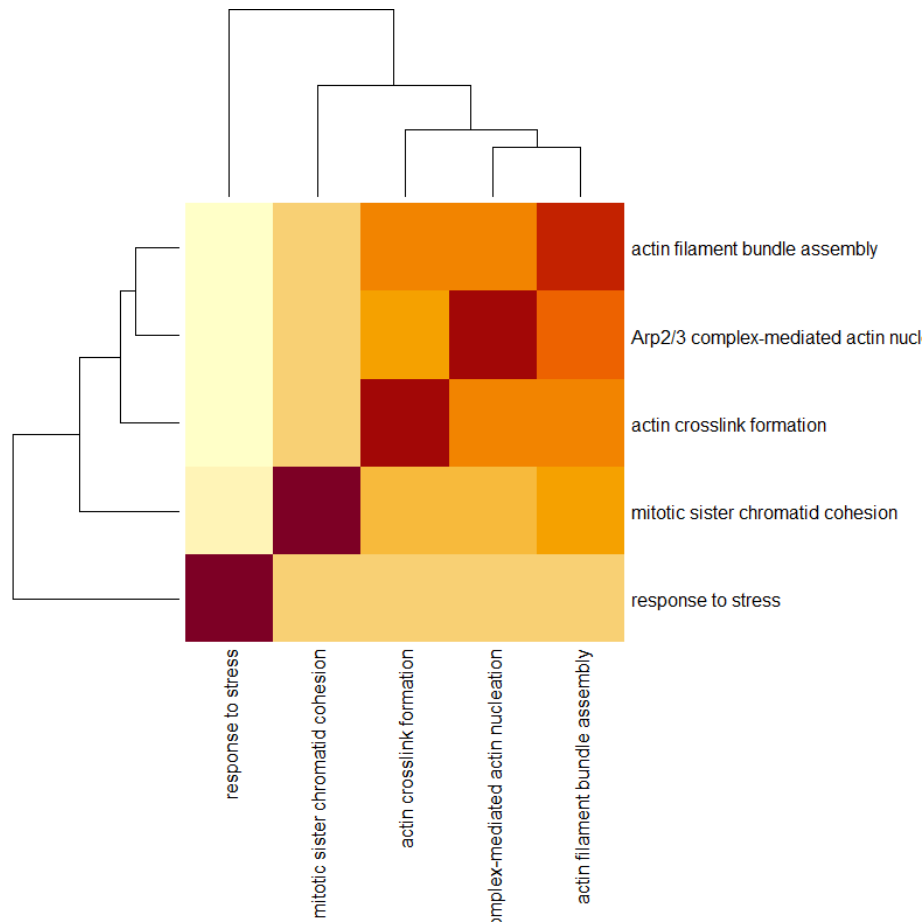

### Supplementary Figure 24. Clustering of significantly enriched GO Terms in non-redundant sORFs.

Significantly enriched GO terms in non-redundant sORFs were identified using a p-value < 0.01, q-value < 0.01, and proportion more than known protein GO Term proportion. Distances between GO terms were calculated using getTermSim function from bioconductor GOSim package using default settings. The distance metric was then used to cluster the terms to enable easier interpretation by grouping similar GO terms.

## Supplementary Figure 25

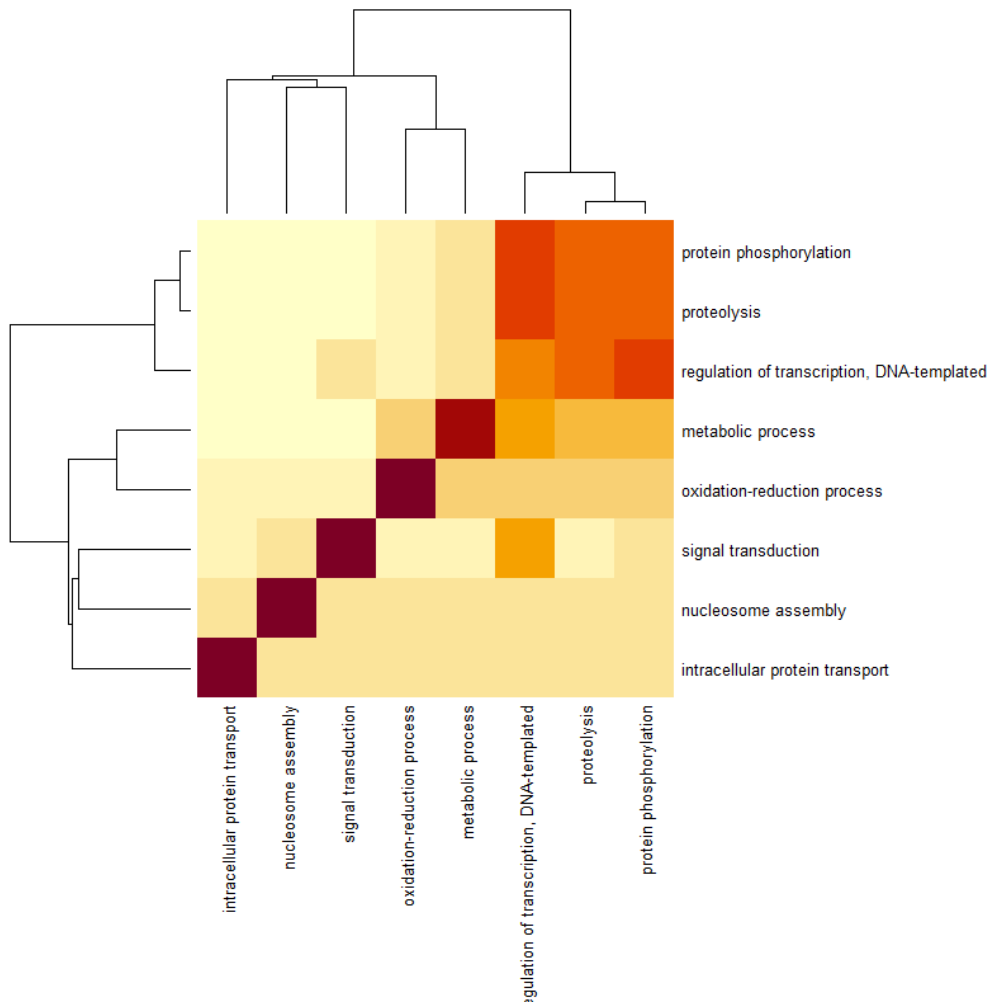

### Supplementary Figure 25. Clustering of significantly depleted GO Terms in non-redundant sORFs.

Significantly depleted GO terms in non-redundant sORFs were identified using a p-value < 0.01, q-value < 0.01, and proportion less than known protein GO Term proportion. Distances between GO terms were calculated using getTermSim function from bioconductor GOSim package using default settings. The distance metric was then used to cluster the terms to enable easier interpretation by grouping similar GO terms.

## Supplementary Figure 26

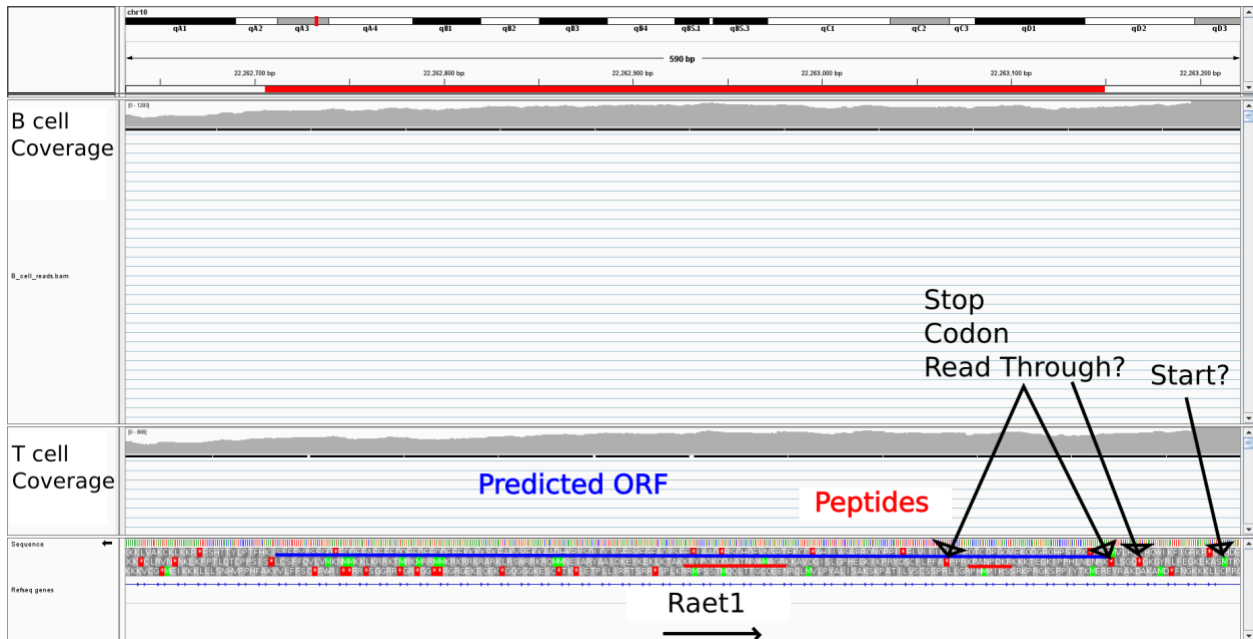

**Supplementary Figure 26. Undefined novel ORF antisense to *Raet1* pseudogene.** Predicted undefined novel ORF (blue line) was identified by proteogenomics analysis. The novel ORF had two distinct peptides (red lines) mapped to it. The novel transcript has two stop and two start codons.



## Supplementary Figure 27

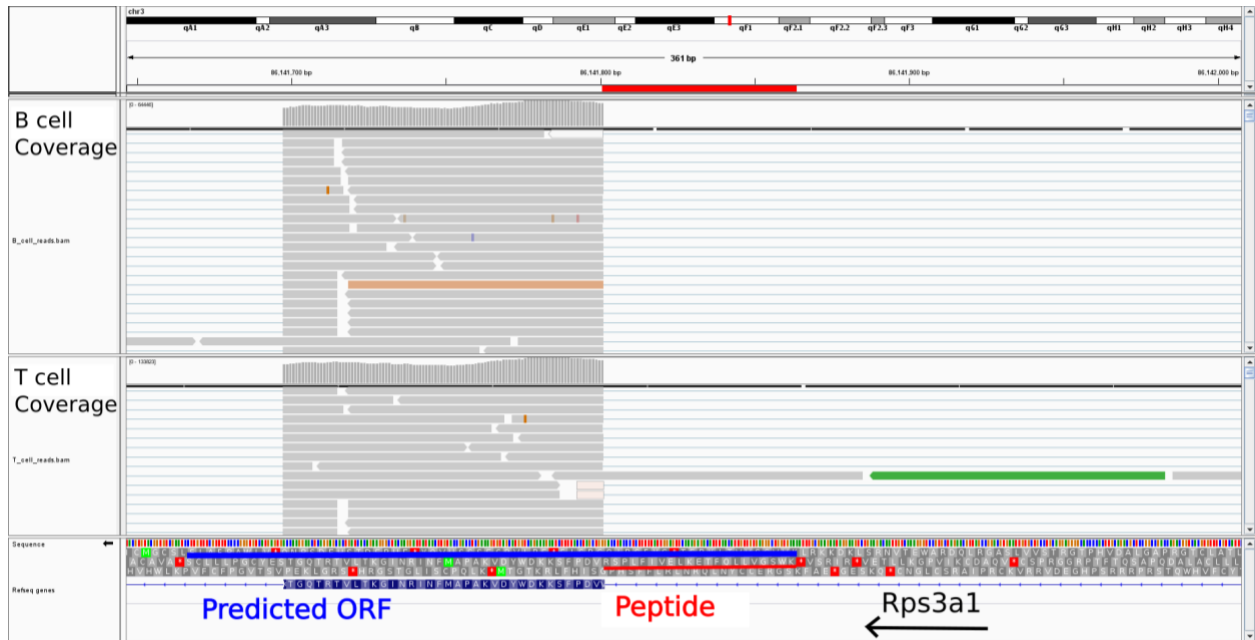

**Supplementary Figure 27. Undefined novel ORF as an intron insertion or novel exon of *Rps3a1*.** An undefined novel ORF (blue line) spans the exon of *Rps3a1*, a known gene which is a constituent of the 40s component of the ribosome. The identified peptides (red line) map to an unannotated exon and is in the same frame, suggesting it may be incorporated into the exon as an insertion.

## Supplementary Figure 28

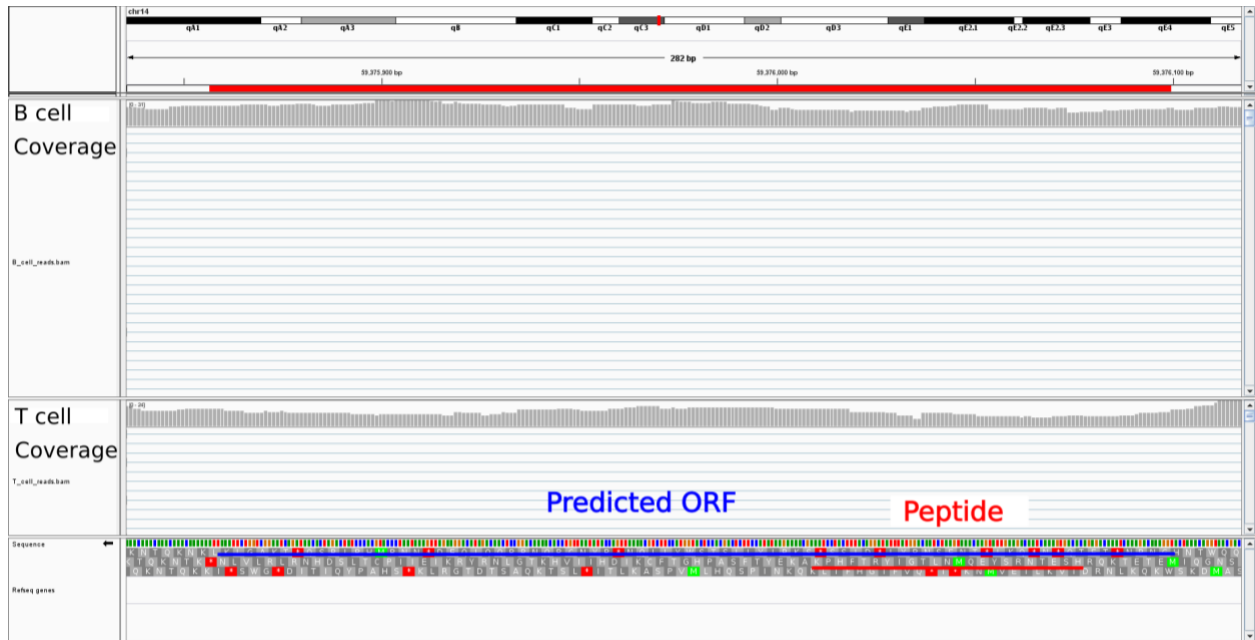

**Supplementary Figure 28. Undefined novel ORF in intergenic region on Chr 14.** An undefined novel ORF (blue line) in intergenic regions of Chr 14 was identified by proteogenomic analysis and by extension of the aligned peptide fragments (red line) both up and downstream until a stop codon or a start codon was encountered.

## Supplementary Figure 29

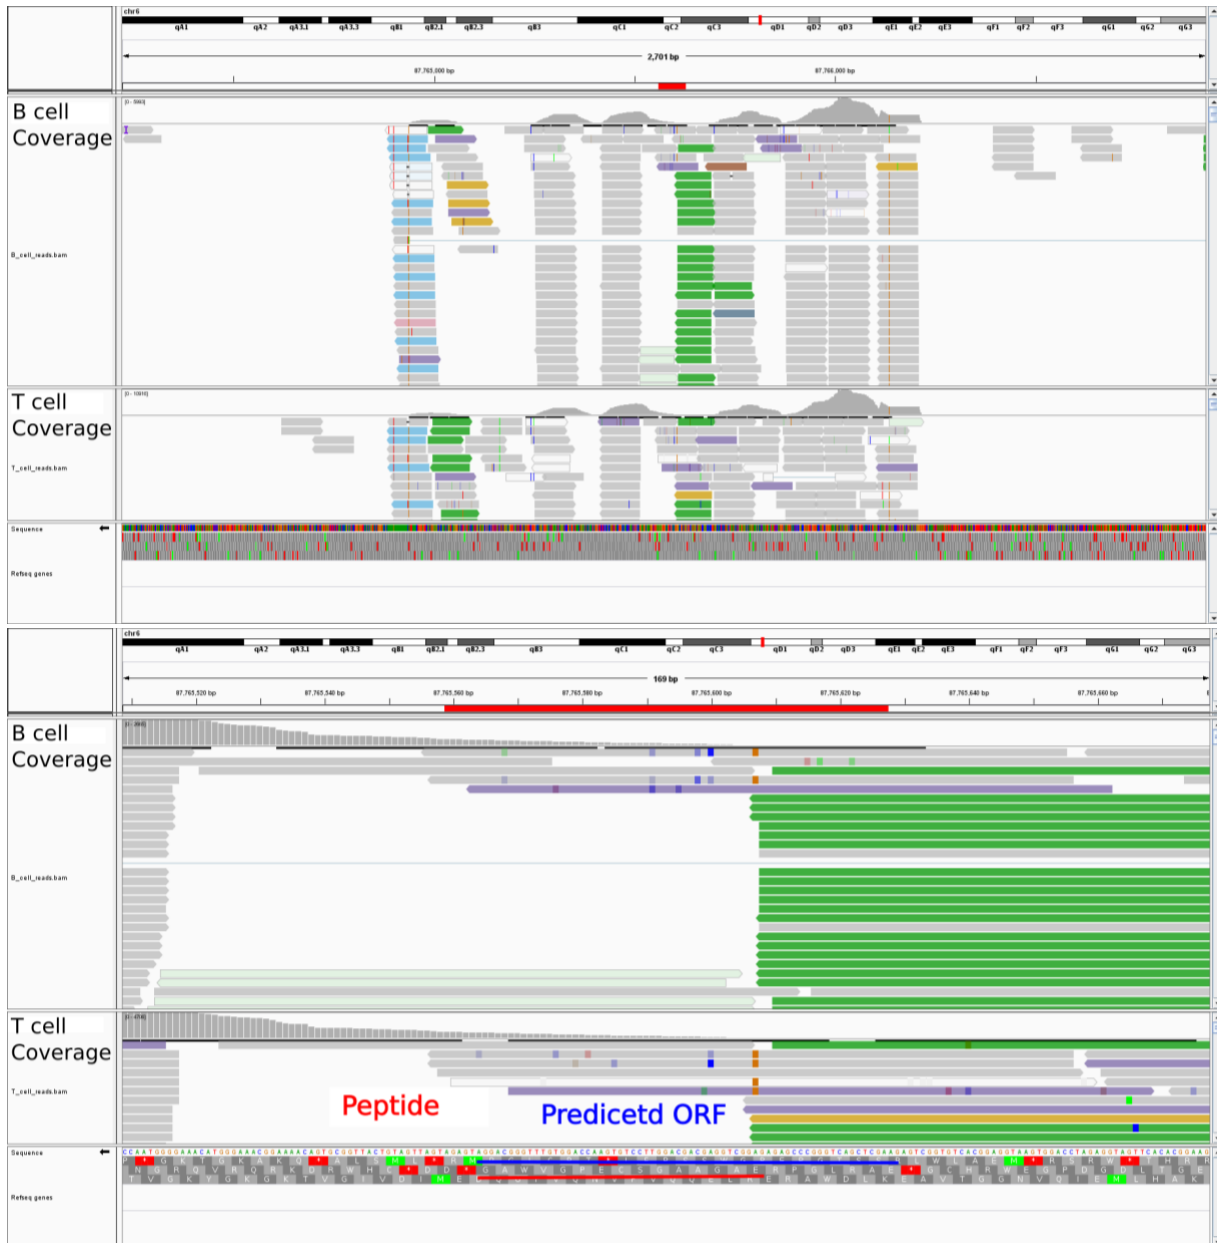

### Supplementary Figure 29. An undefined novel ORF is a processed pseudogene

**ENSMUSG00000068262.** The predicted ORF (blue line) was generated by extension of peptide aligned fragments both up and downstream until a stop codon or a start codon was encountered. **Top panel** provides a zoomed-out view of aligned peptides showing where it lies within a relatively low transcribed region of the pseudogene. **Bottom panel** provides a zoomed in view of the pseudogene.

## Supplementary Figure 30

| GTEX Normal Tissue<br>(n > 50) | TCGA Disease Tissue<br>(n > 50)                                                                             | TCGA Normal Tissue<br>(n > 10) |
|--------------------------------|-------------------------------------------------------------------------------------------------------------|--------------------------------|
|                                | Bladder Urothelial Carcinoma (n=407)                                                                        | Bladder (n=19)                 |
| Brain (n=1148)                 | Brain Lower Grade Glioma (n=508)<br>Glioblastoma Multiforme (n=152)                                         |                                |
| Breast (n=178)                 | Breast Invasive Carcinoma (n=1091)                                                                          | Breast (n=113)                 |
| Colon (n=307)                  | Colon Adenocarcinoma (n=285)                                                                                | Colon (n=41)                   |
| Esophagus (n=652)              | Esophageal Carcinoma (n=181)                                                                                | Esophagus (n=13)               |
|                                | Head & Neck Squamous Cell Carcinoma (n=518)                                                                 | Head and Neck region (n=44)    |
|                                | Kidney Chromophobe (n=66)<br>Kidney Clear Cell Carcinoma (n=530)<br>Kidney Papillary Cell Carcinoma (n=288) | Kidney (n=129)                 |
| Liver (n=110)                  | Liver Hepatocellular Carcinoma (n=369)                                                                      | Liver (n=50)                   |
| Lung (n = 288)                 | Lung Adenocarcinoma (n=513)<br>Lung Squamous Cell Carcinoma (n=498)                                         | Lung (n=109)                   |
| Ovary (n=88)                   | Ovarian Serous Cystadenocarcinoma (n=419)                                                                   |                                |
| Pancreas (n=167)               | Pancreatic Adenocarcinoma (n=178)                                                                           |                                |
| Prostate (n=100)               | Prostate Adenocarcinoma (n=494)                                                                             | Prostate (n=51)                |
| Skin (n=555)                   | Skin Cutaneous Melanoma (n=102)                                                                             |                                |
| Stomach (n=174)                | Stomach Adenocarcinoma (n=413)                                                                              | Stomach (n=36)                 |
| Testis (n=165)                 | Testicular Germ Cell Tumor (n=132)                                                                          |                                |
|                                | Thyroid Carcinoma (n=504)                                                                                   | Thyroid Gland (n=59)           |
| Uterus (n=78)                  | Uterine Carcinosarcoma (n=57)<br>Uterine Corpus Endometrioid Carcinoma (n=180)                              | Endometrium (n=13)             |

**Supplementary Figure 30. Samples and tissues included in this study.** Tissues were included in this study where they had n > 50 samples in the case of TCGA cancer tissues and GTEx normal tissues, and n > 10 samples in TCGA normal adjacent tissue (NAT). Bars indicate matching cancer cohorts and reference tissues. Identification of frequently expressed transcripts and differential expression analysis were performed separately for cancer tissues with NAT or GTEx normal tissue.

## Supplementary Figure 31

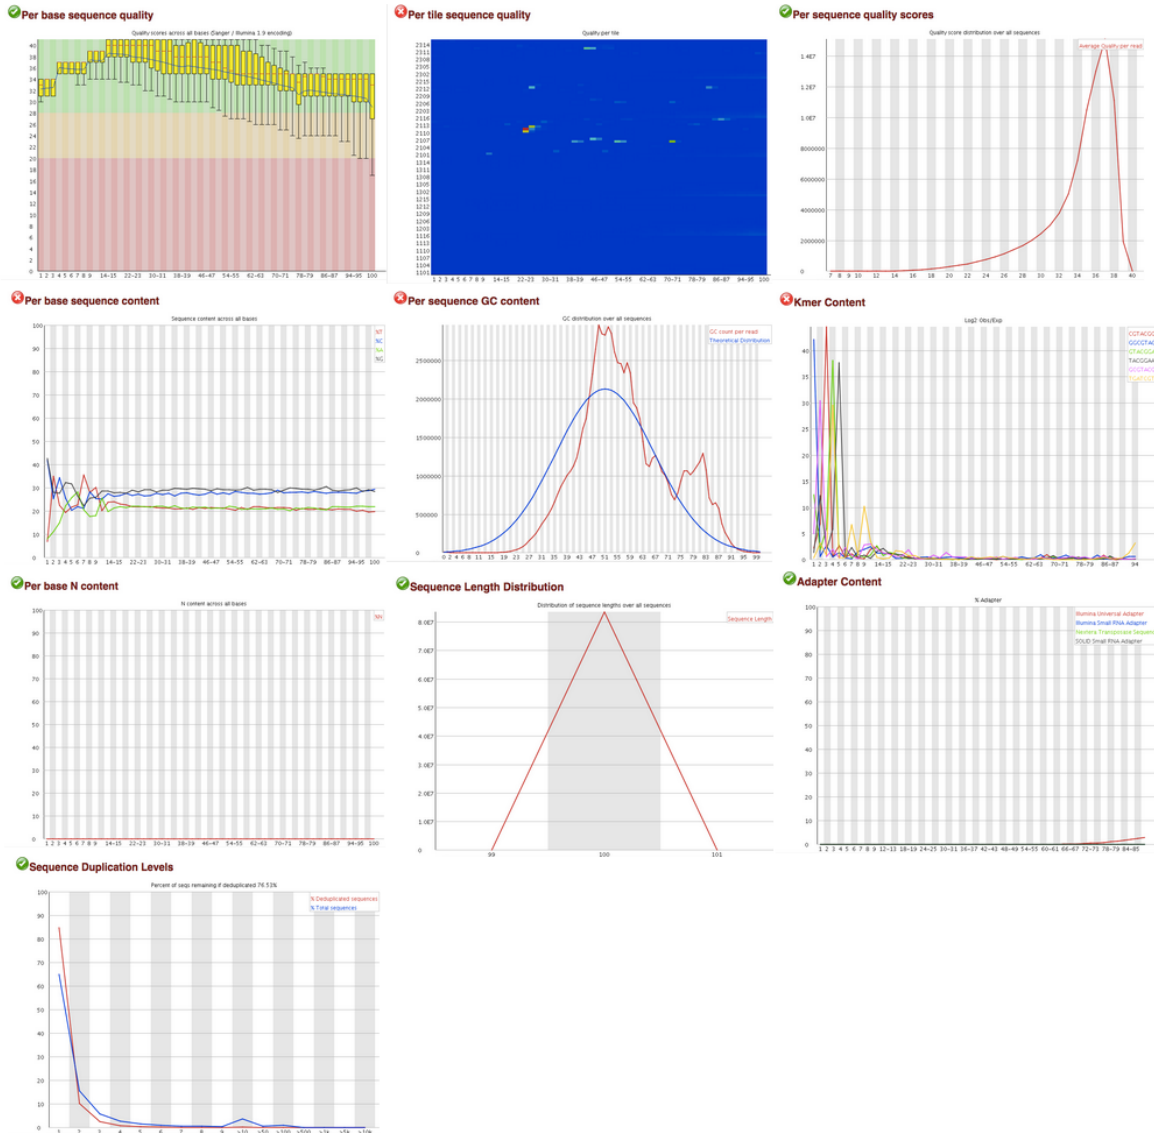

**Supplementary Figure 31. Representative raw read quality metrics generated by FastQC.** The 10 panels shown are a representative FastQC report for the first set of reads for one of the female T cell samples. The ticks or crosses present in each frame represent how the data compare to the quality thresholds defined by FastQC ([www.bioinformatics.babraham.ac.uk/projects/fastqc/Help](http://www.bioinformatics.babraham.ac.uk/projects/fastqc/Help)) and do not necessarily imply that the data are inappropriate for analysis for the purpose of this project. In particular, the expected distribution of the per sequence GC content over (blue line) does not refer specifically to the mouse transcriptome.

**Supplementary Figure 32**

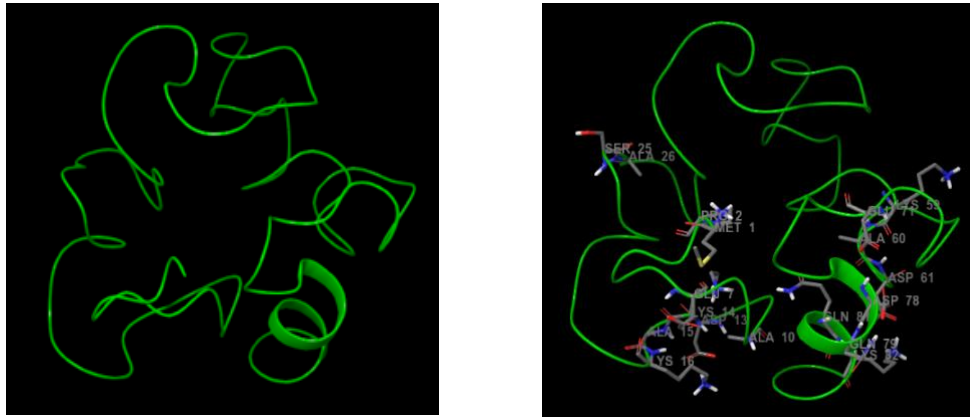

**Supplementary Figure 32:** Evcold predicted structure of the translated product of ENST00000427352.1 (left) with the marked active site residues(right)

### Supplementary Figure 33

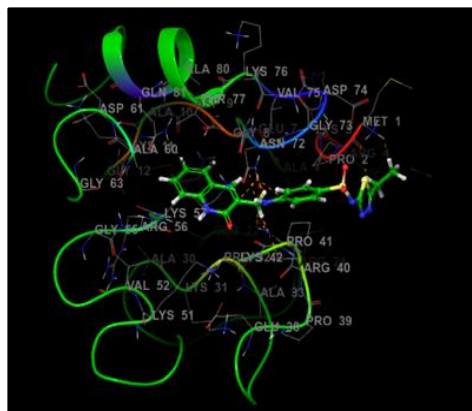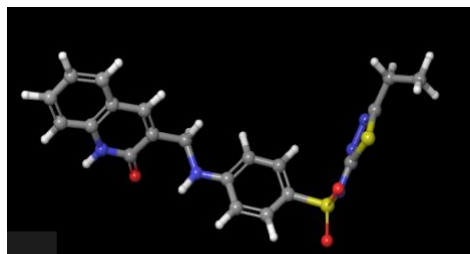

**Supplementary Figure 33:** Structure of the predicted best hit molecule from the immunooncolgy molecule (compound 8462) (bottom) and its complex with the target protein (top). Interacting residues are: Asn 72, Arg 40 and Met 1

### Supplementary Figure 34

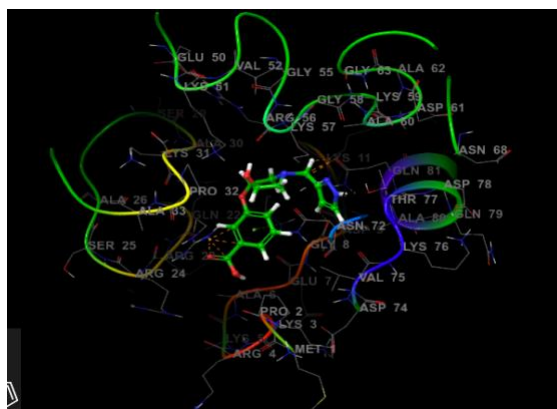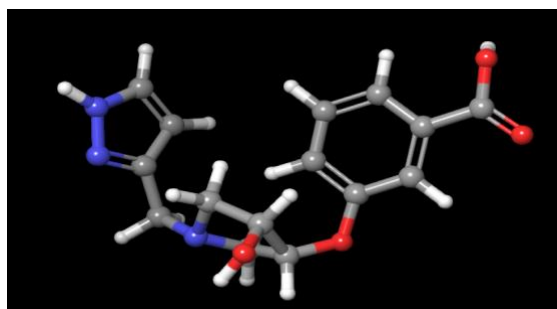

**Supplementary Figure 34:** Structure of the predicted best hit molecule (compound 1491) (bottom) and its complex with the target protein (top). The interacting residues are Gly8, Arg40, Lys51, Lys57 and Gln81.



## Supplementary Figure 35

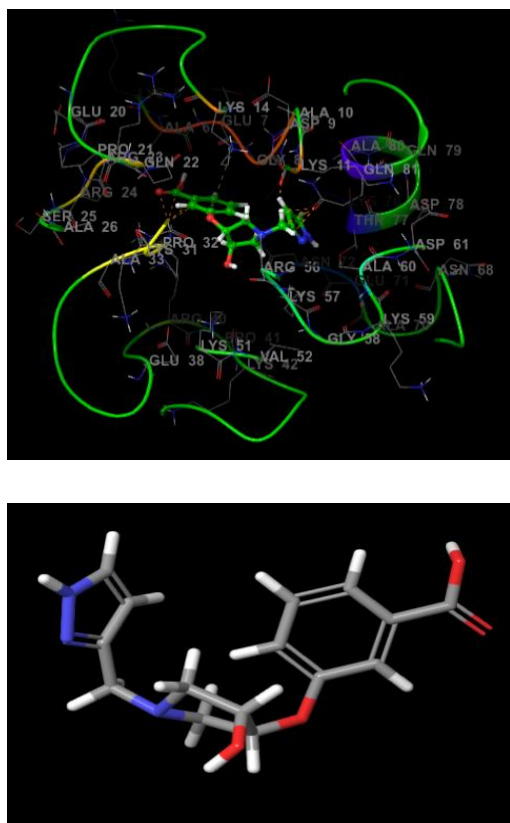

**Supplementary Figure 35:** Structure of the predicted best hit molecule (compound 1355) (bottom) and its complex with the target protein (top). The interacting residues are Gly8, ARG 40 and Gln81

**Supplementary Table 1**

| Sample ID  | GEO Sample ID | Sample identify |
|------------|---------------|-----------------|
| 10966_8_1  | GSM2480724    | B cell female   |
| 10966_8_2  | GSM2480725    | B cell female   |
| 10966_8_3  | GSM2480726    | B cell female   |
| 11048_5_13 | GSM2480727    | B cell male     |
| 11048_5_14 | GSM2480728    | B cell male     |
| 11048_5_15 | GSM2480729    | B cell male     |
| 11049_4_4  | GSM2480730    | T cell female   |
| 11049_4_5  | GSM2480731    | T cell female   |
| 11049_4_6  | GSM2480732    | T cell female   |
| 11049_5_16 | GSM2480733    | T cell male     |
| 11049_5_17 | GSM2480734    | T cell male     |
| 11049_5_18 | GSM2480735    | T cell male     |

**Supplementary Table 1. Information and Sample ID for mice used in transcriptomic analysis.**

Sample IDs used in the transcriptomic analysis, their corresponding GEO sample ID and sample information is provided in the table. GEO sample id can be accessed using GEO accession:

GSM2480756.

**Supplementary Table 2**

| Gene    | Disease Phenotype                                                                                                          | Mutation counts |
|---------|----------------------------------------------------------------------------------------------------------------------------|-----------------|
| ACTG1   | Baraitser-Winter_syndrome                                                                                                  | 1               |
| ACTN4   | Glomerulosclerosis_focal_and_segmental                                                                                     | 1               |
| AK2     | Reticular_dysgenesis                                                                                                       | 2               |
| ARCN1   | Craniofacial_syndrome                                                                                                      | 2               |
| ATP2A2  | Schizophrenia                                                                                                              | 1               |
| ATP2A2  | Darier_disease                                                                                                             | 17              |
| ATP2A2  | Acrokeratosis_verruciformis                                                                                                | 1               |
| BCLAF1  | Colorectal_cancer                                                                                                          | 1               |
| BUB3    | Variegated_aneuploidy                                                                                                      | 1               |
| CALM1   | Catecholaminergic_polymorphic_ventricular_tachycardia                                                                      | 2               |
| CALR    | Schizoaffective_disorder                                                                                                   | 1               |
| DDX3X   | Intellectual_disability                                                                                                    | 5               |
| DDX5    | Fibrosis_risk_association_with                                                                                             | 1               |
| DYNC1H1 | Malformations_of_cortical_development                                                                                      | 1               |
| FLNA    | Thoracic_aortic_aneurysms_and_dissections                                                                                  | 1               |
| FLNA    | Thoracic_aortic_aneurysms                                                                                                  | 1               |
| FLNA    | Otopalatodigital_syndrome_2                                                                                                | 6               |
| FLNA    | Otopalatodigital_syndrome_1                                                                                                | 4               |
| FLNA    | Mental_retardation_X-linked                                                                                                | 1               |
| FLNA    | Melnick-Needles_syndrome_epilepsy_&_heterotopia_periventricular_nodular                                                    | 1               |
| FLNA    | Lower_resp._tract_infection_bilateral_lung_emphysema_with_basal_atelectasis_bronchospasm_and_pulmonary_artery_hypertension | 1               |
| FLNA    | Heterotopia_periventricular_with_skeletal_dysplasia                                                                        | 1               |
| FLNA    | Heterotopia_periventricular_nodular                                                                                        | 7               |
| FLNA    | Heterotopia_periventricular                                                                                                | 12              |
| FLNA    | Heterotopia_nodular                                                                                                        | 1               |
| FLNA    | Frontometaphyseal_dysplasia                                                                                                | 1               |
| FLNA    | FG_syndrome                                                                                                                | 1               |
| FLNC    | Frontotemporal_dementia_behavioural_variant                                                                                | 1               |
| FLNC    | Cardiomyopathy_hypertrophic                                                                                                | 1               |
| GOT1    | Aspartate_aminotransferase_deficiency                                                                                      | 1               |
| GPI     | Glucosephosphate_isomerase_deficiency                                                                                      | 2               |
| HIST3H3 | Intellectual_disability                                                                                                    | 1               |
| HNRNPU  | Lennox-Gastaut_syndrome                                                                                                    | 1               |
| HNRNPU  | Epileptic_encephalopathy                                                                                                   | 1               |
| HSPA9   | Parkinson_disease                                                                                                          | 1               |
| HSPA9   | EVEN-PLUS_syndrome                                                                                                         | 1               |
| LDHA    | Lactate_dehydrogenase_deficiency                                                                                           | 1               |
| LDHB    | Lactate_dehydrogenase_deficiency                                                                                           | 2               |
| LMNA    | Ventricular_arrhythmia                                                                                                     | 1               |
| LMNA    | Spinal_muscular_atrophy_with_cardiac_involvement                                                                           | 1               |

|          |                                                                            |    |
|----------|----------------------------------------------------------------------------|----|
| LMNA     | Peripheral_neuropathy                                                      | 1  |
| LMNA     | Partial_lipodystrophy_atypical                                             | 1  |
| LMNA     | Muscular_dystrophy_limb_girdle_with_severe_heart_failure_and_lipodystrophy | 1  |
| LMNA     | Muscular_dystrophy_limb_girdle                                             | 9  |
| LMNA     | Muscular_dystrophy_Emyr-Dreifuss                                           | 10 |
| LMNA     | Muscular_dystrophy                                                         | 5  |
| LMNA     | Cardiomyopathy_right_ventricular_&_Charcot-Marie-Tooth_disease_2B1         | 1  |
| LMNA     | Cardiomyopathy_dilated_with_conduction_defect_type_1A                      | 1  |
| LMNA     | Cardiomyopathy_dilated                                                     | 23 |
| LMNA     | Cardiac_disease                                                            | 1  |
| LMNA     | Cardiac_conduction_system_disease                                          | 1  |
| LMNA     | Cardiac_conduction_defects                                                 | 1  |
| LMNA     | Arrhythmogenic_right_ventricular_cardiomyopathy                            | 1  |
| MBNL1    | Myotonic_dystrophy                                                         | 1  |
| MECP2    | Rett_syndrome_preserved_speech_variant                                     | 1  |
| MECP2    | Rett_syndrome_atypical                                                     | 1  |
| MECP2    | Rett_syndrome                                                              | 12 |
| MECP2    | Non-fatal_non-progressive_encephalopathy                                   | 1  |
| MECP2    | Neonatal_encephalopathy_severe                                             | 1  |
| MECP2    | Mental_retardation_X-linked                                                | 3  |
| MECP2    | Mental_retardation                                                         | 1  |
| MECP2    | Autism_spectrum_disorder                                                   | 1  |
| MECP2    | Autism                                                                     | 1  |
| PAFAH1B1 | Subcortical_band_heterotopia                                               | 1  |
| PAFAH1B1 | Miller-Dieker_lissencephaly_syndrome                                       | 1  |
| PAFAH1B1 | Lissencephaly_isolated                                                     | 10 |
| PFN1     | Amyotrophic_lateral_sclerosis_association_with                             | 1  |
| PFN1     | Amyotrophic_lateral_sclerosis                                              | 6  |
| PPIB     | Osteogenesis_imperfecta_recessive                                          | 1  |
| PPIB     | Osteogenesis_imperfecta_II                                                 | 1  |
| PPIB     | Osteogenesis_imperfecta                                                    | 2  |
| PPP2R1B  | Breast_cancer                                                              | 1  |
| RPS19    | Diamond-Blackfan_anaemia                                                   | 31 |
| SIN3A    | Intellectual_disability_mild                                               | 1  |
| SLC25A12 | AGC1_deficiency                                                            | 1  |
| SMC1A    | Developmental_delay_epilepsy_delayed_speech_&_encephalopathy               | 1  |
| SMC1A    | Cornelia_de_Lange_syndrome                                                 | 7  |
| SPTAN1   | Intellectual_disability                                                    | 1  |
| STAT1    | Mycobacterial_infection                                                    | 1  |
| STAT1    | Impaired_mycobacterial_immunity                                            | 1  |
| TALDO1   | Transaldolase_deficiency                                                   | 2  |
| TUBA4A   | Amyotrophic_lateral_sclerosis                                              | 3  |
| VIM      | Congenital_cataract                                                        | 1  |

**Supplementary Figure 2. List of genes, associated disease phenotype and number of HGMD mutations corresponding to the phenotype.** Table to accompany **Figure 5c**. The list of gene names mentioned in the legend of Figure 5C is listed in column 1 and the disease phenotype associated with it in column 2. Column 3 highlights the number of HGMD mutations associated with the particular gene and disease phenotype.

Supplementary Table 3

|                                                                                                                                               |                                                                                                                                                |
|-----------------------------------------------------------------------------------------------------------------------------------------------|------------------------------------------------------------------------------------------------------------------------------------------------|
| <p><b>mPLsORF0000299804_significant_EC</b><br/><b>0</b></p> 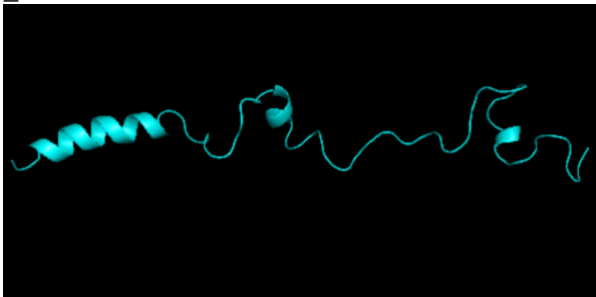 | <p><b>mPLsORF0000442197_significant_EC</b><br/><b>0</b></p>  |
| <p><b>mPLsORF0000453204_68_8_hMIN</b></p>                   | <p><b>mPLsORF0000445046_35_7_hMIN</b></p>                   |
| <p><b>mPLsORF0000452527_significant_EC_0</b></p>           | <p><b>mPLsORF0000137329_55_2_hMIN</b></p>                  |

mPLsORF0000453225\_56\_10\_hMIN

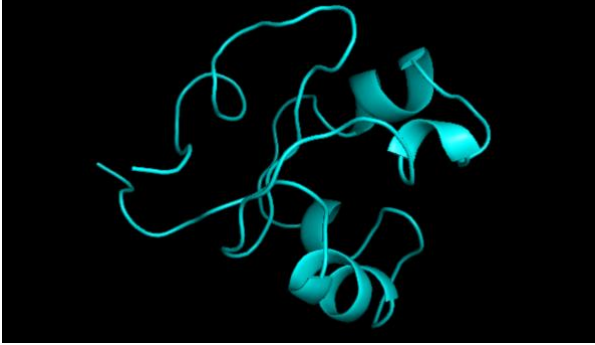

mPLsORF0000449632\_76\_3\_hMIN

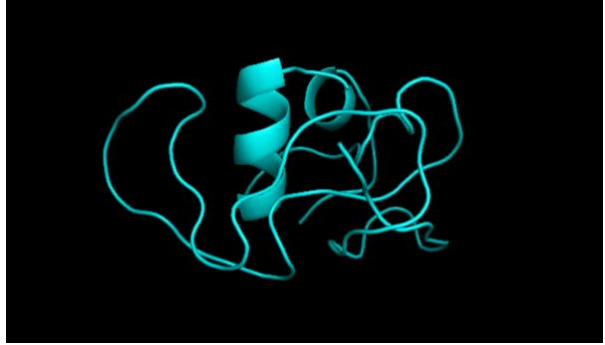

mPLsORF0000443365\_43\_8\_hMIN

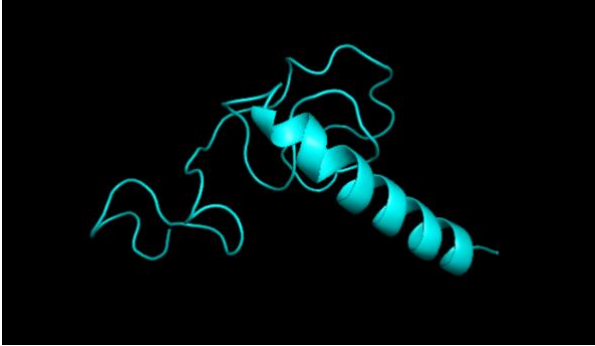

mPLsORF0000450681\_significant\_EC\_s\_0

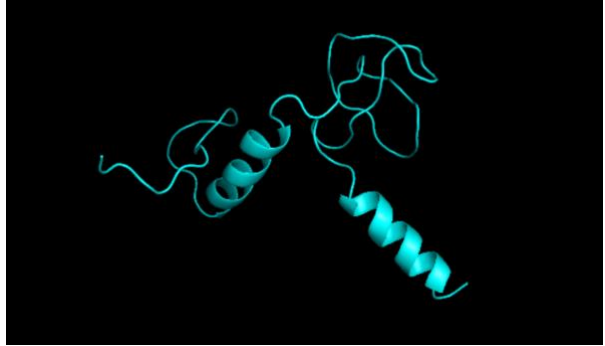

mPLsORF0000451320\_43\_8\_hMIN

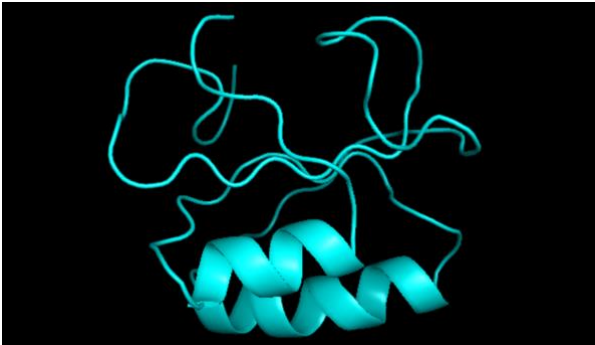

mPLsORF0000114575\_63\_6\_hMIN

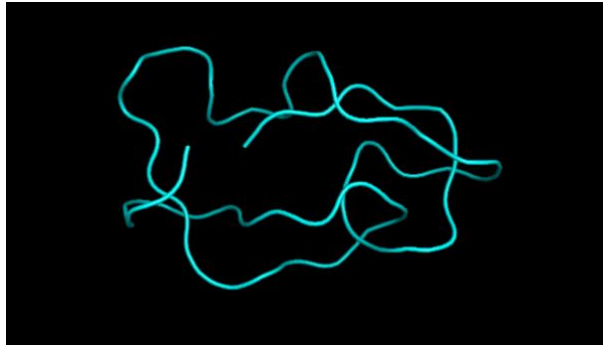

mPLsORF0000443648\_61\_4\_hMIN

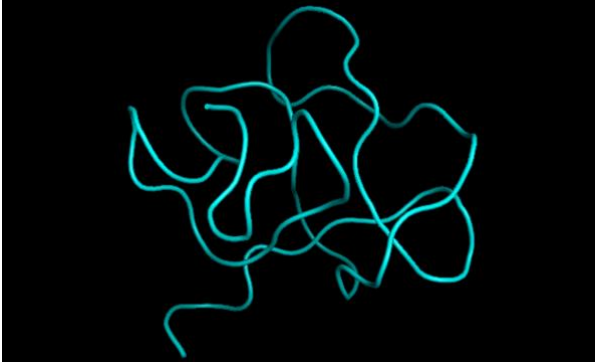

mPLsORF0000446045\_54\_9\_hMIN

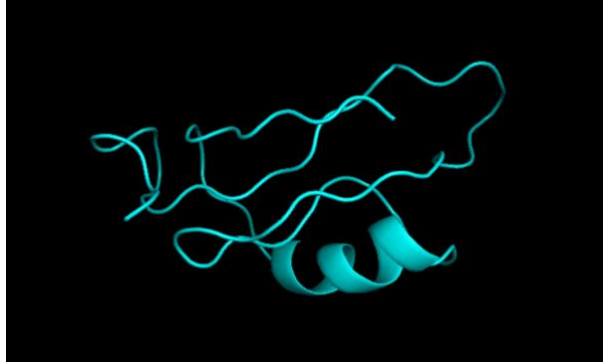

mPLsORF0000446380\_83\_10\_hMIN

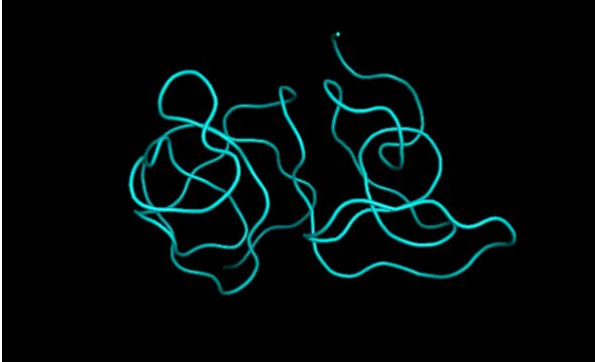

mPLsORF0000446071\_63\_4\_hMIN

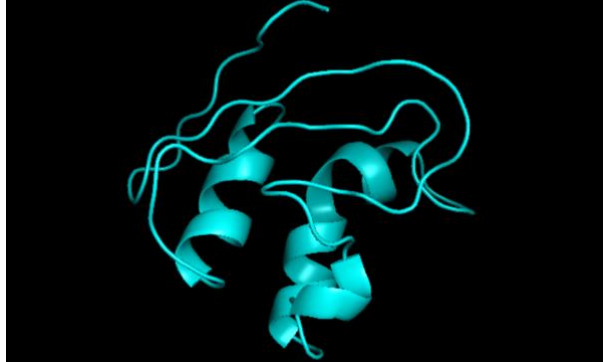

mPLsORF0000440295\_45\_4\_hMIN

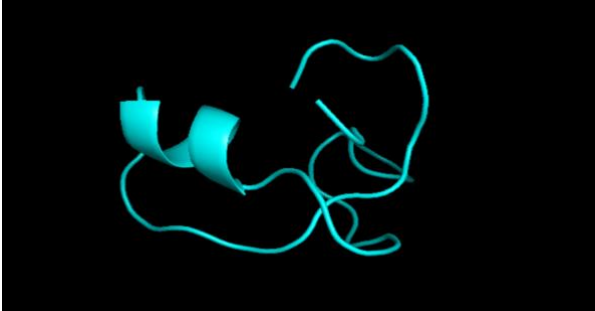

mPLsORF0000059717\_67\_1\_hMIN

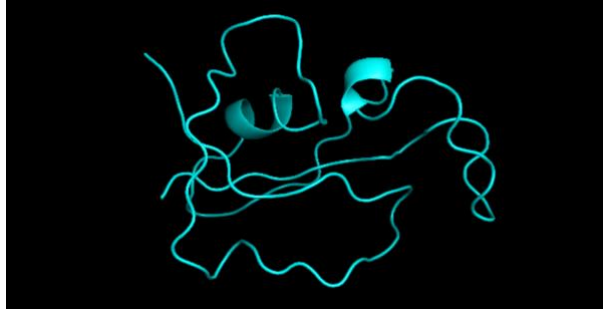



**mPLsORF0000443953\_significant\_ECs\_0**

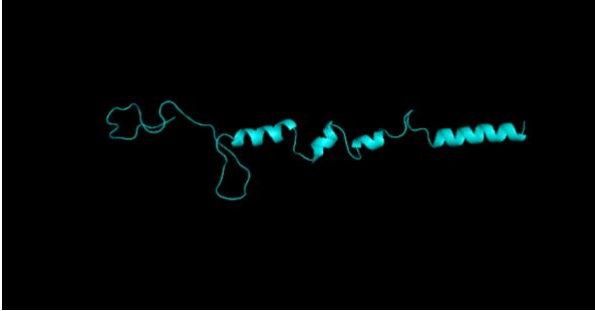

**mPLsORF0000447578\_24\_9\_hMIN**

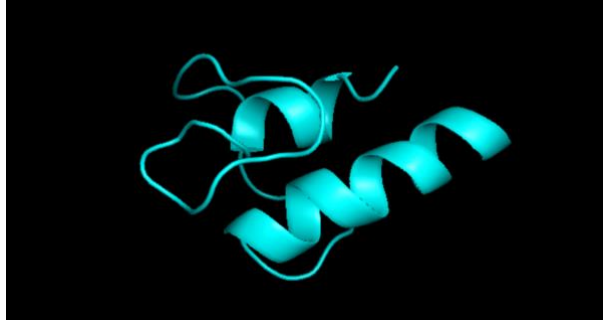

**mPLsORF0000239729\_significant\_ECs\_0**

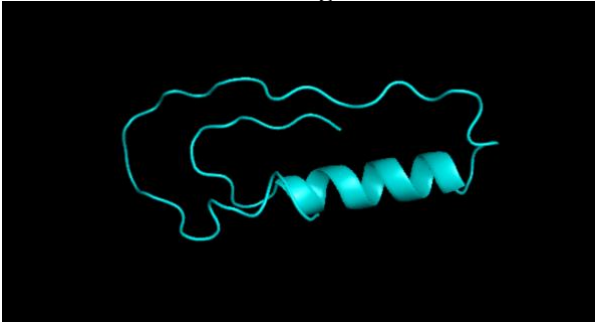

**mPLsORF0000444809\_35\_5\_hMIN**

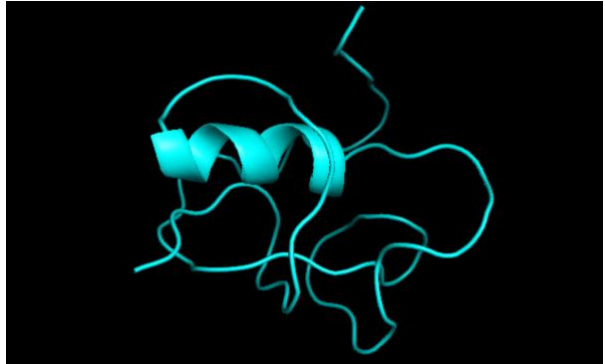

**mPLsORF0000445338\_27\_2\_hMIN**

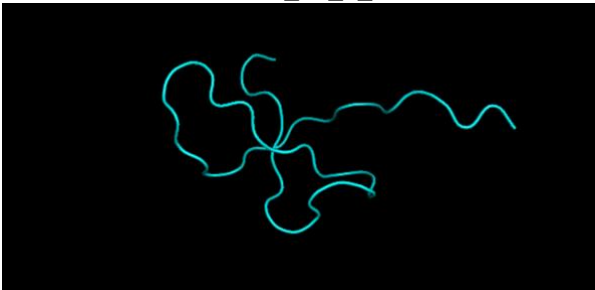

**mPLsORF0000444619\_significant\_ECs\_0**

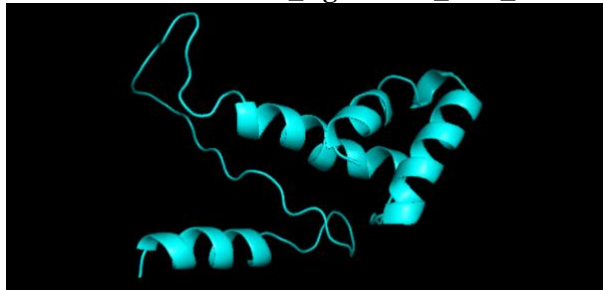

**Supplementary Table 3. Predicted structures of sORFs with translational evidence.** Structures of 24 sORFs for which we have both transcriptional and translational evidence and predicted with EV fold pipeline are displayed in the table.

Supplementary Table 4

|                                                                                                                                                                                                                                                                                                                           |                                                                                                                                                                                                                                                                                                                          |
|---------------------------------------------------------------------------------------------------------------------------------------------------------------------------------------------------------------------------------------------------------------------------------------------------------------------------|--------------------------------------------------------------------------------------------------------------------------------------------------------------------------------------------------------------------------------------------------------------------------------------------------------------------------|
| <p>IP_220049</p> 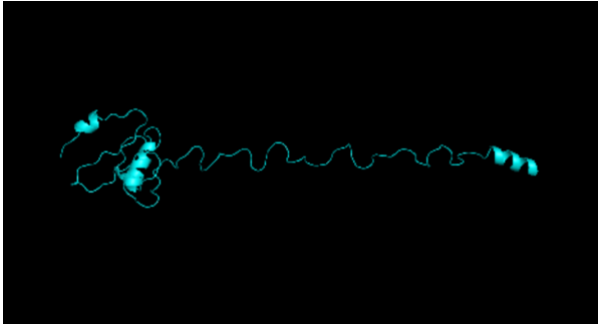 <p>A 3D ribbon diagram of protein IP_220049, shown in cyan. The structure is elongated and features a distinct globular domain at the N-terminus, followed by a long, relatively straight alpha-helical segment.</p>   | <p>IP_189960</p>  <p>A 3D ribbon diagram of protein IP_189960, shown in cyan. The structure is elongated and features a distinct globular domain at the N-terminus, followed by a long, relatively straight alpha-helical segment.</p> |
| <p>IP_195050</p>  <p>A 3D ribbon diagram of protein IP_195050, shown in cyan. The structure is compact and features a prominent alpha-helical region.</p>                                                                               | <p>IP_195051</p>  <p>A 3D ribbon diagram of protein IP_195051, shown in cyan. The structure is compact and features a prominent alpha-helical region.</p>                                                                             |
| <p>IP_159154</p>  <p>A 3D ribbon diagram of protein IP_159154, shown in cyan. The structure is elongated and features a distinct globular domain at the N-terminus, followed by a long, relatively straight alpha-helical segment.</p> | <p>IP_275965</p>  <p>A 3D ribbon diagram of protein IP_275965, shown in cyan. The structure is compact and features a prominent alpha-helical region.</p>                                                                            |

|                                                                                                     |                                                                                                     |
|-----------------------------------------------------------------------------------------------------|-----------------------------------------------------------------------------------------------------|
| <p>IP_233967</p> 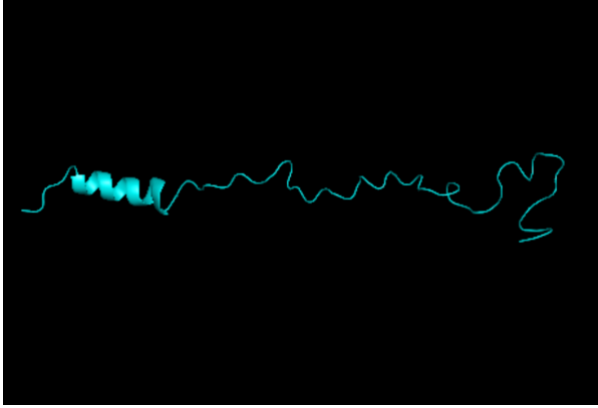  | <p>IP_233958</p>  |
| <p>IP_199907</p>  |                                                                                                     |

**Supplementary Table 4. Predicted structures of nine altORFs with translational evidence.**

Structures of nine altORFs for which we have both transcriptional and translational evidence and predicted with EV fold pipeline are displayed in the table.

### Supplementary Table 5

| <b>Mutation ID(s)</b> | <b>Change</b> | <b>Effect on sORF</b> | <b>SORF secondary structure</b> |
|-----------------------|---------------|-----------------------|---------------------------------|
| COSN19210254          | 115553735 T>A | K5>K                  | C                               |
| #COSN8491742          | 115553987 C>A | A89>T                 | C                               |

# mutation not mapped on the structure

**Supplementary Table 5.** The table shows the list of cosmic mutation IDs for Figure 6B along with the nucleic acid change, predicted amino acid change according to the standard amino acid code, and the predicted secondary structure of the protein at that position. C = Coil.

**Supplementary Table 6**

| <u>TCGA cancer abbreviation</u> | <u>TCGA cancer</u>             | <u>Primary site of the tumor</u> | <u>Number of sample of solid tissue normal (Tnor)</u> | <u>Number of tumor samples (Ttum)</u> | <u>Primary site of GTEX samples</u> | <u>GTEX - site with sublocations</u>                                                                                                                                                                                                                                              | <u>Number of healthy normal samples from GTEX</u> |
|---------------------------------|--------------------------------|----------------------------------|-------------------------------------------------------|---------------------------------------|-------------------------------------|-----------------------------------------------------------------------------------------------------------------------------------------------------------------------------------------------------------------------------------------------------------------------------------|---------------------------------------------------|
| BLCA                            | Bladder Urothelial Carcinoma   | Bladder                          | 19                                                    | 407                                   | Bladder                             | Bladder                                                                                                                                                                                                                                                                           | 9                                                 |
| GBM                             | Glioblastoma Multiforme        | Brain                            | 5                                                     | 166                                   | Brain                               | Brain - Amygdala, Anterior Cingulate Cortex (Ba24), Caudate (Basal Ganglia), Cerebellar Hemisphere, Cerebellum, Cortex, Frontal Cortex (Ba9), Hippocampus, Hypothalamus, Nucleus Accumbens (Basal Ganglia), Putamen (Basal Ganglia), Spinal Cord (Cervical C-1), Substantia Nigra | 1152                                              |
| BRCA                            | Breast Invasive Carcinoma      | Breast                           | 113                                                   | 1099                                  | Breast                              | Breast - Mammary Tissue                                                                                                                                                                                                                                                           | 179                                               |
| CESC                            | Cervical & Endocervical Cancer | Cervix                           | 3                                                     | 306                                   | Cervix Uteri                        | Cervix – Ectocervix, Endocervix                                                                                                                                                                                                                                                   | 10                                                |
| COAD                            | Colon Adenocarcinoma           | Colon                            | 41                                                    | 290                                   | Colon                               | Colon – Sigmoid, Transverse                                                                                                                                                                                                                                                       | 308                                               |
| READ                            | Rectum Adenocarcinoma          | Rectum                           | 10                                                    | 93                                    | Colon                               | Colon – Sigmoid, Transverse                                                                                                                                                                                                                                                       | 308                                               |
| ESCA                            | Esophageal Carcinoma           | Esophagus                        | 13                                                    | 182                                   | Esophagus                           | Esophagus - Gastroesophageal Junction, mucosa, muscularis                                                                                                                                                                                                                         | 655                                               |
| KICH                            | Kidney Chromophobe             | Kidney                           | 25                                                    | 66                                    | Kidney                              | Kidney - Cortex                                                                                                                                                                                                                                                                   | 28                                                |
| KIRC                            | Kidney Clear Cell Carcinoma    | Kidney                           | 72                                                    | 531                                   | Kidney                              | Kidney - Cortex                                                                                                                                                                                                                                                                   | 28                                                |
| KIRP                            | Kidney Papillary               | Kidney                           | 32                                                    | 289                                   | Kidney                              | Kidney -                                                                                                                                                                                                                                                                          | 28                                                |

|      |                                       |                  |    |     |          |             |     |
|------|---------------------------------------|------------------|----|-----|----------|-------------|-----|
|      | Cell Carcinoma                        |                  |    |     |          | Cortex      |     |
| LIHC | Liver Hepatocellular Carcinoma        | Liver            | 50 | 371 | Liver    | Liver       | 110 |
| LUAD | Lung Adenocarcinoma                   | Lung             | 59 | 515 | Lung     | Lung        | 288 |
| LUSC | Lung Squamous Cell Carcinoma          | Lung             | 50 | 498 | Lung     | Lung        | 288 |
| PAAD | Pancreatic Adenocarcinoma             | Pancreas         | 4  | 179 | Pancreas | Pancreas    | 167 |
| PRAD | Prostate Adenocarcinoma               | Prostate         | 52 | 496 | Prostate | Prostate    | 100 |
| STAD | Stomach Adenocarcinoma                | Stomach          | 36 | 414 | Stomach  | Stomach     | 175 |
| THCA | Thyroid Carcinoma                     | Thyroid Gland    | 59 | 512 | Thyroid  | Thyroid     | 279 |
| UCEC | Uterine Corpus Endometrioid Carcinoma | Endometrium      | 23 | 181 | Uterus   | Uterus      | 78  |
| DLBC | Diffuse large B-cell lymphoma         | Lymphatic tissue | 0  | 47  | Blood    | Whole Blood | 337 |

**Supplementary Table 6:** Details of the cancer and matched normal tissue samples from TCGA and GTEX studies respectively, downloaded from UCSC Xena.

**Supplementary Table 7**

| Software | Residues                                                                                                                                                                                  | Residues selected for docking                                                                                                                                                                     |
|----------|-------------------------------------------------------------------------------------------------------------------------------------------------------------------------------------------|---------------------------------------------------------------------------------------------------------------------------------------------------------------------------------------------------|
| Castp    | Pro2, Ala6, Glu7, Gly8, Lys11<br>Gly12, Lys14, Gln22, Arg23,<br>Arg24<br>Ala30, Pro32, ARG40, Pro41,<br>Lys51, Arg56, Lys57, Ala60,<br>Asn72, Gly73, Val75, Lys76,<br>Thr77, Ala80, Gln81 | Pro2, Ala6, Glu7, Gly8, Lys11,<br>Gly12, Asp13, Thr15,<br>Gln22, Arg23, Arg24<br>Ala30, Pro32, ARG40, Pro41,<br>Lys51, Arg56, lys57, Ala60,<br>Asn72, Gly73, Val75, Lys76,<br>Thr77, Ala80, Gln81 |
| SiteMap  | Pro2, Glu7, Gly8, Asp13,<br>Thr15, Ala60, Ala80, Gln81                                                                                                                                    |                                                                                                                                                                                                   |

**Supplementary Table 7:** Predicted active site residues used in docking are listed above



**Supplementary Table 8**

| Compound Id | Docking Score |
|-------------|---------------|
| 8462        | -7.011        |
| 11233       | -6.436        |
| 10977       | -6.029        |
| 11189       | -5.996        |
| 10976       | -5.678        |
| 11212       | -5.473        |
| 4965        | -5.187        |
| 8554        | -4.966        |
| 10035       | -4.774        |
| 9994        | -4.698        |
| 11188       | -4.689        |
| 10516       | -4.433        |
| 9987        | -4.399        |
| 10922       | -4.390        |
| 10413       | -4.387        |
| 10547       | -4.263        |
| 11232       | -4.214        |

**Supplementary Table 8:** Table shows the top immuno-oncology library compounds and their docking scores with the nORF ENST00000427352.1.

### Supplementary Table 9

| Compound Id | Docking Score |
|-------------|---------------|
| 1491        | -7.114        |
| 139         | -6.883        |
| 1479        | -6.739        |
| 700         | -6.662        |
| 140         | -6.496        |
| 3256        | -6.268        |
| 6649        | -5.997        |
| 4095        | -5.987        |
| 1581        | -5.974        |
| 3104        | -5.959        |
| 4093        | -5.952        |

**Supplementary Table 9:** Table shows the top targeted-oncology library compounds and their docking scores with the nORF ENST00000427352.1.

### Supplementary Table 10

| Compound Id | Docking Score |
|-------------|---------------|
| 1355        | -7.238        |
| 129         | -6.883        |
| 687         | -6.662        |
| 1347        | -6.631        |

**Supplementary Table 10:** Table shows the top signaling inhibitors and their docking scores with the nORF ENST00000427352.1.

### Supplementary Table 11

| Top Compounds | Binding energy (Kcal/mol) |
|---------------|---------------------------|
| 8462          | -38.68                    |
| 11233         | -45.76                    |
| 10977         | -45.53                    |
| 11189         | -33.22                    |

**Supplementary Table 11:** MM-GBSA binding energies, which estimates relative binding affinities for the few best hits from immuno-oncology library compounds.

### Supplementary Table 12

| Top Compounds | Binding Energy (Kcal/mol) |
|---------------|---------------------------|
| 1491          | -44.31                    |
| 139           | -35.59                    |
| 1479          | -43.03                    |
| 700           | -38.03                    |
| 140           | -47.83                    |

**Supplementary Table 12:** MM-GBSA binding energies, which estimates relative binding affinities for the few best hits from targeted-oncology library compounds.

### Supplementary Table 13

| Top Compounds | Binding energy (Kcal/mol) |
|---------------|---------------------------|
| 1355          | -7.238                    |
| 129           | -6.883                    |
| 687           | -6.662                    |
| 1347          | -6.631                    |

**Supplementary Table 13:** MM-GBSA binding energies, which estimates relative binding affinities for the few best hits from Signaling Pathway inhibitors.
